1 **Pharmacological inhibition of lysine-specific demethylase 1 (LSD1) induces**  
2 **global transcriptional deregulation and ultrastructural alterations that**  
3 **impair viability in *Schistosoma mansoni***

4

5 Vitor Coutinho Carneiro<sup>1#</sup>, Isabel Caetano de Abreu da Silva<sup>1</sup>, Murilo Sena Amaral<sup>2</sup>, Adriana  
6 S.A. Pereira<sup>2,3</sup>, Gilbert O. Silveira<sup>2,3</sup>, David da Silva Pires<sup>2</sup>, Sérgio Verjovski-Almeida<sup>2,3</sup>,  
7 Frank J. Dekker<sup>4</sup>, Dante Rotili<sup>5</sup>, Antonello Mai<sup>5</sup>, Eduardo José Lopes Torres<sup>6</sup>, Dina Robaa<sup>7</sup>,  
8 Wolfgang Sippl<sup>7</sup>, Raymond J. Pierce<sup>8</sup>, M. Teresa Borrello<sup>9</sup>, A. Ganesan<sup>10</sup>, Julien Lancelot<sup>8</sup>,  
9 Silvana Thiengo<sup>11</sup>, Monica Ammon Fernandez<sup>11</sup>, Amanda Roberta Revoredo Vicentino<sup>1</sup>,  
10 Marina Moraes Mourão<sup>12</sup>, Fernanda Sales Coelho<sup>12</sup> and Marcelo Rosado Fantappiè<sup>1\*</sup>

11

12 *Epigenetic therapy: targeting histone de-methylation to control schistosomiasis*

13

14 <sup>1</sup>Instituto de Bioquímica Médica Leopoldo de Meis, Programa de Biologia Molecular e  
15 Biotecnologia, Centro de Ciências da Saúde, 21941-902, Universidade Federal do Rio de  
16 Janeiro, Rio de Janeiro, Brazil;

17 <sup>2</sup>Laboratório de Parasitologia, Instituto Butantan, 05503-900, São Paulo, Brazil;

18 <sup>3</sup>Departamento de Bioquímica, Instituto de Química, Universidade de São Paulo, 05508-900,  
19 São Paulo, Brasil;

20 <sup>4</sup>Department of Chemical and Pharmaceutical Biology, University of Groningen, Antonius  
21 Deusinglaan 1, 9713 AV Groningen, Netherlands;

22 <sup>5</sup>Department of Drug Chemistry and Technologies, Sapienza University of Rome, 00185,  
23 Rome, Italy;

24 <sup>6</sup>Laboratório de Helminologia Romero Lascasas Porto, Faculdade de Ciências Médicas,  
25 Universidade do Estado do Rio de Janeiro, 20550-170, Rio de Janeiro, Brazil;

26 <sup>7</sup>Institute of Pharmacy, Martin Luther University of Halle-Wittenberg, Wolfgang-  
27 Langenbeck-Str.4, 06120 Halle/Saale, Germany;

28 <sup>8</sup>Université de Lille, CNRS, Inserm, CHU Lille, Institut Pasteur de Lille, U1019 - UMR 8204  
29 - CIIL - Centre d'Infection et d'Immunité de Lille, 59000 Lille, France ;

30 <sup>9</sup>Centre de Recherche en Cancérologie de Marseille (CRCM), INSERM U1068, CNRS UMR  
31 7258, Aix-Marseille Université and Institut Paoli-Calmettes, Parc Scientifique et  
32 Technologique de Luminy, 163 Avenue de Luminy, 13288 Marseille, France;

33 <sup>10</sup>School of Pharmacy, University of East Anglia, Norwich Research Park, Norwich NR4 7TJ,  
34 United Kingdom;

35 <sup>11</sup>Laboratório de Malacologia, Fundação Oswaldo Cruz, Instituto Oswaldo Cruz, Rio de  
36 Janeiro, 21040-360 Brazil;

37 <sup>12</sup>Grupo de Helminologia e Malacologia Médica, Instituto René Rachou, Fundação Oswaldo  
38 Cruz, Belo Horizonte, 30190-009, Brazil.

39 #Current address: Division of Epigenetics, German Cancer Research Center, Im Neuenheimer  
40 Feld 580, 69120 Heidelberg, Germany.

41

42 \*Corresponding author: M.R. Fantappiè, Instituto de Bioquímica Médica, Universidade  
43 Federal do Rio de Janeiro, CCS, Ilha do Fundão, Rio de Janeiro, 21941-902, Brazil. Tel: +55-  
44 21-3938-6608; E-mail: [fantappie@bioqmed.ufrj.br](mailto:fantappie@bioqmed.ufrj.br)

45

46

## 47 **Abstract**

48 Treatment and control of schistosomiasis still rely on only one effective drug,  
49 praziquantel (PZQ), and due to mass treatment, the increasing risk of selecting for  
50 schistosome strains that are resistant to PZQ has alerted investigators to the urgent need to  
51 develop novel therapeutic strategies. The histone-modifying enzymes (HMEs) represent  
52 promising targets for the development of epigenetic drugs against *Schistosoma mansoni*. In  
53 the present study, we targeted the *S. mansoni* lysine-specific demethylase 1 (SmLSD1), a  
54 transcriptional corepressor, using a novel and selective synthetic inhibitor, MC3935. We  
55 synthesized a novel and potent LSD1 inhibitor, MC3935, which was used to treat  
56 schistosomula or adult worms *in vitro*. By using cell viability assays and optical and electron  
57 microscopy, we showed that treatment with MC3935 affected parasite motility, egg-laying,  
58 tegument, and cellular organelle structures, culminating in the death of schistosomula and  
59 adult worms. *In silico* molecular modeling and docking analysis suggested that MC3935  
60 binds to the catalytic pocket of SmLSD1. Western blot analysis revealed that MC3935  
61 inhibited SmLSD1 demethylation activity of H3K4me1/2. Knockdown of SmLSD1 by RNAi  
62 recapitulated MC3935 phenotypes in adult worms. RNA-seq analysis of MC3935-treated  
63 parasites revealed significant differences in gene expression related to critical biological  
64 processes. Collectively, our findings show that SmLSD1 is a promising drug target for the  
65 treatment of schistosomiasis and strongly support the further development and *in vivo* testing  
66 of selective schistosome LSD1 inhibitors.

## 67 **Author Summary**

68 Schistosomiasis mansoni is a chronic and debilitating tropical disease caused by the helminth  
69 *Schistosoma mansoni*. The control and treatment of the disease rely almost exclusively on  
70 praziquantel (PZQ). Thus, there is an urgent need to search for promising protein targets to  
71 develop new drugs. Drugs that inhibit enzymes that modify the chromatin structure have been

72 developed for a number of diseases. We and others have shown that *S. mansoni* epigenetic  
73 enzymes are also potential therapeutic targets. Here we evaluated the potential of the *S.*  
74 *mansoni* histone demethylase LSD1 (SmLSD1) as a drug target. We reported the synthesis of  
75 a novel and potent LSD1 inhibitor, MC3935, and show that it selectively inhibited the  
76 enzymatic activity of SmLSD1. Treatment of juvenile or adult worms with MC3935 caused  
77 severe damage to the tegument of the parasites and compromised egg production.  
78 Importantly, MC3935 proved to be highly toxic to *S. mansoni*, culminating in the death of  
79 juvenile or adult worms within 96 h. Transcriptomic analysis of MC3935-treated parasites  
80 revealed changes in the gene expression of hundreds of genes involved in key biological  
81 processes. Importantly, SmLSD1 contains unique sequences within its polypeptide chain that  
82 could be explored to develop a *S. mansoni* selective drug.

## 83 **Introduction**

84 Schistosomes are large metazoan pathogens that parasitize over 200 million people  
85 worldwide, resulting in up to 300,000 deaths per year (1,2). No efficacious vaccine is  
86 available for human schistosomiasis, and the control and treatment of the disease rely almost  
87 exclusively on praziquantel (PZQ), the only effective drug against schistosome species.  
88 Despite its efficacy, PZQ does not kill juvenile parasites, allowing reinfection (3), and there is  
89 a constant concern with the appearance of PZQ-resistant strains of *Schistosoma* (4–6). Thus,  
90 there is an urgent need to search for promising protein targets to develop new drugs.

91 Transcription factors and chromatin modifiers play primary roles in the programming  
92 and reprogramming of cellular states during development and differentiation, as well as in  
93 maintaining the correct cellular transcriptional profile (7). Indeed, a plethora of  
94 groundbreaking studies has demonstrated the importance of posttranslational modifications of  
95 histones for transcription control and normal cell development. Therefore, the deregulation of  
96 epigenetic control is a common feature of a number of diseases, including cancer (7).

97           The complexity of schistosome development and differentiation implies tight control  
98 of gene expression at all stages of the life cycle and that epigenetic mechanisms are likely to  
99 play key roles in these processes. In recent years, targeting the *Schistosoma mansoni*  
100 epigenome has emerged as a new and promising strategy to control schistosomiasis. The  
101 study of histone acetylation in *S. mansoni* biology and the effect of inhibitors of histone  
102 deacetylases (HDACs and SIRT6) or histone acetyltransferases (HATs) on parasite  
103 development and survival have demonstrated the importance of these enzymes as potential  
104 therapeutic targets (8–12).

105           Unlike histone lysine acetylation, which is generally coupled to gene activation,  
106 histone lysine methylation can have different biological associations depending on the  
107 position of the lysine residue and the degree of methylation (13). Patterns of specific lysine  
108 methyl modifications are achieved by a precise lysine methylation system, consisting of  
109 proteins that add, remove and recognize the specific lysine methyl marks. Importantly,  
110 histone lysine methylation (14–16) and demethylation (17) have been recently demonstrated  
111 to be potential drug targets against *S. mansoni*.

112           Lysine-specific demethylase 1 (LSD1) was the first protein reported to exhibit histone  
113 demethylase activity and has since been shown to have multiple essential roles in metazoan  
114 biology (18). LSD1 enzymes are characterized by the presence of an amine oxidase (AO)-like  
115 domain, which is dependent on its cofactor flavin-adenine dinucleotide (FAD), a SWIRM  
116 domain, which is unique to chromatin-associated proteins (19) and an additional coiled-coil  
117 TOWER domain (20). LSD1 is a component of the CoREST transcriptional corepressor  
118 complex that also contains CoREST, CtBP, HDAC1 and HDAC2. As part of this complex,  
119 LSD1 demethylates mono-methyl and di-methyl histone H3 at Lys4 (H3K4me1/2), but not  
120 H3K4me3 (21). In addition, when recruited by androgen or estrogen receptor, LSD1 functions  
121 as a H3K9 demethylase. Given the high level of expression and enzymatic activity of LSD1 in

122 many types of tumors, there has been significant recent interest in the development of  
123 pharmacological inhibitors (22).

124 In our continuing effort to study the biology and therapeutic potential of epigenetic  
125 regulators in *S. mansoni*, we have found schistosome LSD1 (SmLSD1, Sm\_150560) as a  
126 potential drug target (this paper). During the course of our investigation, a recent publication  
127 (17) described the repurposing of some anthracyclines as anti-Schistosoma agents, suggesting  
128 by *in silico* docking SmLSD1 as a putative target without any evidence of enzyme inhibition.

129 In the present work we show the SmLSD1-inhibitory activity of a novel synthetic  
130 LSD1 inhibitor MC3935 (100-fold more potent than the canonical human LSD1 inhibitor  
131 tranylcypromine, TCP). In addition, we show that the LSD1 inhibitor MC3935 was able to  
132 kill both adult worms and schistosomula *in vitro*. Importantly, silencing of SmLSD1 by  
133 dsRNAi partially recapitulated MC3935-treatment phenotypes in adult worms. Our RNA-seq  
134 analysis revealed a large-scale transcriptional deregulation in parasites that were treated with  
135 sublethal doses of MC3935, which could be the primary cause of the ultrastructure defects  
136 and death of *S. mansoni*. Together, these findings elucidate the biological relevance of histone  
137 lysine methylation in *S. mansoni* and provide insights into the therapeutic potential of  
138 SmLSD1 to control schistosomiasis.

## 139 **Materials and methods**

### 140 **Ethics statement**

141 Animals were handled in strict accordance with good animal practice as defined by the  
142 Animal Use Ethics Committee of UFRJ (Universidade Federal do Rio de Janeiro). This  
143 protocol was registered at the National Council for Animal Experimentation (CONCEA-  
144 01200.001568/2013-87) with approval number 086/14. The study adhered to the institution's  
145 guidelines for animal husbandry.

## 146 **Protein alignment and phylogenetic relationships**

147 Multiple-sequence alignment of the full-length proteins was performed using  
148 representatives of *C. elegans* (NP\_493366.1), *D. melanogaster* (NP\_649194.1), *H. sapiens*  
149 (NP\_055828.2), *M. musculus* (NP\_598633.2), *D. rerio* (XP\_005158840.1), *A. thaliana*  
150 (NP\_187981.1), *S. japonicum* (TNN15244.1), *S. haematobium* (XP\_012793780.1), and *S.*  
151 *mansoni* (Smp\_150560) LSD1 protein sequences, as previously published (23). Pairwise  
152 comparisons to the reference followed by calculation of the maximum distance matrix  
153 resulted in an unrooted phylogenetic tree, which was visualized using Tree of Life v1.0 (24).

## 154 **Chemistry**

155 Compound MC3935 (Supplementary Fig S1A) was synthesized by coupling of the  
156 racemic *tert*-butyl (2-(4-aminophenyl)cyclopropyl)carbamate, prepared as previously reported  
157 (25), with the commercially available 4-ethynylbenzoic acid, followed by acidic deprotection  
158 of the Boc-protected amine.

159 <sup>1</sup>H-NMR spectra were recorded at 400 MHz using a Bruker AC 400 spectrometer;  
160 chemical shifts are reported in ppm units relative to the internal reference tetramethylsilane  
161 (Me<sub>4</sub>Si). Mass spectra were recorded on an API-TOF Mariner by Perspective Biosystem  
162 (Stratford, Texas, USA). Samples were injected by a Harvard pump at a flow rate of 5-10  
163 μL/min and infused into the electrospray system. All compounds were routinely checked by  
164 TLC and <sup>1</sup>H-NMR. TLC was performed on aluminum-backed silica gel plates (Merck DC,  
165 Alufolien Kieselgel 60 F<sub>254</sub>) with spots visualized by UV light or using a KMnO<sub>4</sub> alkaline  
166 solution. All solvents were reagent grade and, when necessary, were purified and dried by  
167 standard methods. The concentration of solutions after reactions and extractions involved the  
168 use of a rotary evaporator operating at a reduced pressure of ~ 20 Torr. Organic solutions  
169 were dried over anhydrous sodium sulfate. Elemental analysis was used to determine the

170 purity of the final compound 1 (MC3935) which was >95%. Analytical results were within  
171 0.40% of the theoretical values. As a rule, the sample prepared for physical and biological  
172 studies was dried in high vacuum over P<sub>2</sub>O<sub>5</sub> for 20 h at temperatures ranging from 25 to 40  
173 °C. Abbreviations are defined as follows: dimethylformamide (DMF), *N*-(3-  
174 dimethylaminopropyl)-*N*'-ethylcarbodiimide (EDCI), 1-hydroxybenzotriazole hydrate  
175 (HOBt), triethylamine (TEA), ethyl acetate (EtOAc) and tetrahydrofuran (THF).

176 **Preparation of tert-Butyl- (trans-2(4-(4-ethynylbenzamido)phenyl)cyclopropyl)**  
177 **carbamate (3)**

178 4-Ethynylbenzoic acid (135.4 mg, 0.93 mmol, 1.15 eq), EDCI (216.2 mg, 1.13 mmol,  
179 1.4 eq), HOBt (152.4 mg, 1.13 mmol, 1.4 eq) and TEA (0.43 mL, 3.06 mmol, 3.8 eq) were  
180 added sequentially to a solution of 2 (200 mg, 0.805 mmol, 1.0 eq) in dry DMF (4.5 mL) (Fig.  
181 S1). The resulting mixture was then stirred for approximately 7 h at room temperature and,  
182 after completion of the reaction, quenched with NaHCO<sub>3</sub> saturated solution (40 mL). The  
183 aqueous solution was extracted with EtOAc (4 x 25 mL); washed with 0.1 N KHSO<sub>4</sub> solution  
184 (2 x 10 mL), NaHCO<sub>3</sub> saturated solution (3 x 10 mL) and brine (3 x 5 mL); dried over  
185 anhydrous Na<sub>2</sub>SO<sub>4</sub> and finally concentrated under vacuum. The crude product was then  
186 purified by column chromatography on silica gel eluting with a mixture EtOAc:hexane 25:75  
187 to afford 3 as a pink solid (193 mg, 64%). <sup>1</sup>H-NMR (400 MHz, CDCl<sub>3</sub>): δ 1.06-1.10 (m, 2H, -  
188 CH<sub>2</sub>-), 1.39 (s, 9H, -COO(CH<sub>3</sub>)<sub>3</sub>), 1.94-1.98 (m, 1H, Ar-CH-), 2.63 (m, 1H, -CH-NH-  
189 COO(CH<sub>3</sub>)<sub>3</sub>), 3.16 (s, 1H, HC≡C-), 4.78 (s, 1H, -NH-COO(CH<sub>3</sub>)<sub>3</sub>), 7.07-7.09 (d, 2H, *H*-Ar),  
190 7.44-7.47 (d, 2H, *H*-Ar), 7.52-7.54 (d, 2H, *H*-Ar), 7.69 (s, 1H, Ar-CO-NH-Ar), 7.74-7.76 (d,  
191 2H, *H*-Ar). MS (ESI), *m/z*: 377 [M + H]<sup>+</sup>.



192 **Preparation of N-(4-(trans-2-aminocyclopropyl)phenyl)-4-ethynylbenzamide**  
193 **hydrochloride (1, MC3935)**

194 To a solution of 3 (125 mg, 0.332 mmol, 1 eq.) in dry THF (9 mL) was added 4N HCl  
195 in dioxane (5.4 mL, 21.6 mmol, 65 eq.) while cooling at 0 °C. Then, the resulting suspension  
196 was stirred at room temperature for approximately 1 h. Finally, the suspension was filtered off  
197 and washed over the filter in sequence with dry THF (1 x 3 mL) and dry diethyl ether (4 x 3  
198 mL) to afford 1 (MC3935) as a slightly pink solid (90.8 mg, 87.5%). <sup>1</sup>H-NMR (400 MHz,  
199 DMSO-*d*<sub>6</sub>): δ 1.16-1.21 (m, 1H, -CHH-), 1.33-1.38 (m, 1H, -CHH-), 2.26-2.31 (m, 1H, -CH-  
200 Ar), 2.77-2.80 (m, 1H, -CH-NH<sub>2</sub>·HCl), 4.43 (s, 1H, HC≡C-), 7.14-7.16 (d, 2H, *H*-Ar), 7.63-  
201 7.65 (d, 2H, *H*-Ar), 7.70-7.72 (d, 2H, *H*-Ar), 7.95-7.98 (d, 2H, *H*-Ar), 8.28 (br s, 3H, -CH-  
202 NH<sub>2</sub>·HCl), 10.33 (s, 1H, Ar-CONH-Ar). MS (ESI), *m/z*: 277 [M + H]<sup>+</sup>. Anal. (C<sub>18</sub>H<sub>17</sub>ClN<sub>2</sub>O)  
203 Calcd. (%): C, 69.12; H, 5.48; Cl, 11.33; N, 8.96. Found (%) C, 69.26; H, 5.50; Cl, 11.27; N,  
204 8.87.

205 **Biochemistry**

206 Human LSD1 (KDM1A) (lysine (K)-specific demethylase 1A) was purchased from  
207 BPS Bioscience (catalog No 50097). Monomethylated histone peptide H3K4N(CH<sub>3</sub>) was  
208 purchased from Pepscan and horseradish peroxidase (HRP) from Pierce (Catalog No. 31490).  
209 The reagents for buffer preparation were purchased from Merck, Netherlands. Reactions were  
210 conducted in black 96-well flat-bottom microplates (Corning<sup>®</sup> Costar<sup>®</sup>). The fluorescence  
211 measurements were carried out in a Synergy H1 Hybrid Multi-Mode Microplate Reader  
212 (BioTek, USA) and the gain setting of the instrument was adjusted to 70. . GraphPad Prism  
213 5.0 was used for determination of the half-maximal inhibitory concentration (IC<sub>50</sub>). Nonlinear  
214 regression was used for data fitting.

## 215 **Human LSD1 inhibition assay**

216 Compound 1 (MC3935) was screened for inhibition against human recombinant  
217 LSD1. The *in vitro* assay was based on the oxidative demethylation of the monomethylated  
218 histone peptide H3K4N(CH<sub>3</sub>) via a FAD/FADH<sub>2</sub> mediated reduction of O<sub>2</sub> to H<sub>2</sub>O<sub>2</sub>. The  
219 remaining LSD1 activity was monitored via the detection of the amount of H<sub>2</sub>O<sub>2</sub> formed. This  
220 was done by horseradish peroxidase (HRP), which reduces H<sub>2</sub>O<sub>2</sub> to H<sub>2</sub>O using Amplex Red<sup>2</sup>  
221 as the electron donor. The resulting product, resorufin, was highly fluorescent at 590 nm. The  
222 inhibition assay was performed as described previously (26). The compound was  
223 preincubated at different concentrations with LSD1 for 15 min at room temperature in the  
224 presence of HRP-Amplex Red. The substrate was then added, and the fluorescence was  
225 measured for 30 min.

## 226 **Homology modeling**

227 The amino acid sequence of SmLSD1 was retrieved from Unipro (27) (accession  
228 number: G4VK09). Subsequently, alignment of SmLSD1 and HsLSD1 sequences was  
229 performed using MOE version 2018.01 (*Molecular Operating Environment (MOE)*, 2018.01;  
230 Chemical Computing Group Inc., Canada). Long inserts in the sequence of SmLSD1 (aa: 205-  
231 271, 324-385, 828-860, 883-910, and 965-983) were deleted and consequently not modeled.  
232 The saved alignment file was used to generate a homology model of SmLSD1 based on the  
233 cocrystal structure of hLSD1 with MC2580 (PDB ID 2XAS) (26) using MODELLER 9.11  
234 (28).

## 235 **Ligand preparation**

236 Similar to the observed adduct of the analogous tranlycypromine derivative MC2584  
237 with FAD (PDB ID 2XAQ (29)), an N5 adduct of MC3935 with FAD was generated in MOE

238 using only the flavin ring of FAD. The generated adduct was then cured using LigPrep  
239 (Schrödinger Release 2018-1): protonation states were assigned at pH 7±1 using Epik,  
240 tautomeric forms, as well as possible conformers were generated, and energy minimized using  
241 the OPLS03 force field. As a result, 25 low-energy conformers were generated using the  
242 bioactive search module implemented in Schrödinger.

### 243 **Protein preparation**

244 The generated homology model of SmLSD1 was prepared with Schrödinger's Protein  
245 Preparation Wizard (Schrödinger Release 2018-1); where hydrogen atoms were added and the  
246 hydrogen bond network was optimized. The protonation states at pH 7.0 were predicted using  
247 the PROPKA tool in Schrödinger, and the structure was subsequently subjected to a restrained  
248 energy minimization using the OPLS03 force field (RMSD of the atom displacement for  
249 terminating the minimization was 0.3 Å).

### 250 **Docking**

251 The receptor grid preparation for the docking procedure was carried out by assigning  
252 the coordinates of the cut cocrystallized adduct (only the flavin ring was kept in FAD) as the  
253 centroid of the grid box. Molecular docking was performed using Glide (Schrödinger Release  
254 2018-1) in the Standard Precision mode. A total of 20 poses per ligand conformer were  
255 included in the postdocking minimization step, and a maximum of one docking pose was  
256 stored for each conformer.

### 257 **Parasite stock**

258 The Belo Horizonte strain of *Schistosoma mansoni* (Belo Horizonte, Brazil) was  
259 maintained in the snail (*Biomphalaria glabrata*) as the intermediate host and the golden

260 hamster (*Mesocricetus auratus*) as the definitive host (30). Female hamsters aged 3–4 weeks,  
261 weighing 50–60 g, were infected by exposure to a *S. mansoni* cercarial suspension containing  
262 approximately 250 cercariae using intradermal injection. The adult worms were obtained by  
263 hepatoportal perfusion at 42–49 days postinfection. Cercariae were released from infected  
264 snails and mechanically transformed to obtain schistosomula *in vitro* (31).

## 265 **Treatment of *S. mansoni* with LSD1 inhibitors**

266 Schistosomula or adult worms were treated with different concentrations of LSD1  
267 inhibitors, as indicated in the figure legends. For each treatment condition, 10 worm pairs  
268 were maintained in 60-mm diameter culture dishes in 2 mL of culture medium (medium  
269 M169 (Gibco) supplemented with 10% fetal bovine serum (Vitrocell),  
270 penicillin/streptomycin, amphotericin and gentamicin (Vitrocell). Schistosomula were  
271 maintained in 96-well or 24-well culture plates, depending on the experiment, with 200  $\mu$ L or  
272 1 mL of culture medium M169 (Gibco), respectively, supplemented with 2% fetal bovine  
273 serum (Vitrocell), 1  $\mu$ M serotonin, 0.5  $\mu$ M hypoxanthine, 1  $\mu$ M hydrocortisone, 0.2  $\mu$ M  
274 triiodothyronine, penicillin/streptomycin, amphotericin and gentamicin (Vitrocell). Parasites  
275 were maintained at 37 °C in 5% CO<sub>2</sub> with a humid atmosphere. The medium containing the  
276 LSD1 inhibitors or DMSO (vehicle) was refreshed every 24 h during the treatment period (1–  
277 4 days).

## 278 **Viability assay**

279 An inverted stereomicroscope (Leica M80) was used to evaluate the physiology and  
280 behavior of the parasites. Parasites were observed every 24 h, and representative images and  
281 videos were acquired. Schistosomula motility, light opacity, and membrane integrity were  
282 evaluated. Adult worm motility, pairing state, adherence to dish surface, and egg laying were

283 monitored and determined. The viability was determined using the CellTiter-Glo Luminescent  
284 Cell Viability Assay (Promega) (32). Total cell lysates from one thousand schistosomula or  
285 10 adult worms (paired or unpaired) were submitted to an ATP dosage. Eggs laid on the  
286 plates were quantified daily.

### 287 **SmLSD1 mRNA quantification**

288 After treatment, the total RNA was extracted using a RiboPure kit (Ambion) followed  
289 by DNase treatment (Ambion) and cDNA synthesis (Superscript III, Invitrogen), following  
290 the manufacturer's instructions. The resulting cDNA was diluted 10-fold in water and qPCR  
291 amplification was performed with 5  $\mu$ L of diluted cDNA in a total volume of 15  $\mu$ L using  
292 SYBR Green Master Mix (Life Technologies) and specific primer pairs (SmLSD1\_qPCR\_F:  
293 5' – CCACTTCAAAGTCCCTGTC – 3' and SmLSD1\_qPCR\_R: 5' –  
294 TCATCTTGATCCCAATGACGT – 3', SmTubulin\_qPCR\_F: 5' –  
295 GGATTTGACGGAATTCCAAA – 3' and SmTubulin\_qPCR\_R: 3' –  
296 AACGCTTAACTGCTCGTGGT – 3') designed for *S. mansoni* genes by Primer3 online  
297 software (<http://www.bioinformatics.nl/cgi-bin/primer3plus/primer3plus.cgi>). QuantStudio 3  
298 Real-Time PCR System (Applied Biosystems) was used. The results were analyzed by the  
299 comparative Ct method, and the statistical significance was calculated with the student t-test.

### 300 **Western blotting**

301 Nuclear protein extracts from schistosomula or adult worms were prepared as  
302 previously described (31). From each sample, 10  $\mu$ g of each extract was loaded on 7-12%  
303 precast SDS-polyacrylamide gels (Bio-Rad). After transference, membranes were blocked  
304 with Tris-buffered saline (TBS) containing 0.1% Tween 20 and 2% bovine serum albumin  
305 (TBST/2% BSA) and then probed overnight with specific antibodies in TBS/2% BSA.

306 Membranes were washed with TBST and incubated for 1 h in TBST/2% BSA with secondary  
307 antibody (Immunopure goat anti-mouse # 31430, Thermo Scientific, and peroxidase-labeled  
308 affinity anti-rabbit # 04-15-06, KPL). After washing the membranes in TBST, the bands were  
309 visualized and images were recorded with the Amersham Imaging System (GE Healthcare),  
310 and quantified with ImageJ software (NIH). Histone monoclonal antibodies used were anti-  
311 H3K4me1 (#5326, Cell Signaling), anti-H3K4me2 (#9725, Cell Signaling) and anti-  
312 H3K4me3 (#9727, Cell Signaling), following the manufacturer's instructions. For all  
313 antibodies, a 1:1000 dilution was used. For normalization of the signals across the samples,  
314 anti-histone H3 antibody (#14269, Cell Signaling) was used.

### 315 **Caspase 3/7 activity**

316 The activity of caspase 3/7 was measured using the Caspase-Glo 3/7 assay kit  
317 (Promega) following the instructions. Cell lysates from schistosomula were obtained from  
318 2,000 parasites cultivated in a 24-well plate with complete medium (as described above) and  
319 treated with MC3935 25  $\mu$ M or vehicle (DMSO 0.25%). The luminescence was measured in a  
320 white-walled 96-well plate in a Wallac Victor2 1420 multilabel counter (PerkinElmer).

### 321 **TUNEL assay**

322 Detection of DNA strand breaks in MC3935-treated schistosomula was performed  
323 using the *In situ* Cell Death Detection kit (Roche), as previously described (33).  
324 Schistosomula were fixed after 72 h treatment with MC3935 or DMSO. Parasites were  
325 mounted in a superfrost glass slide using Prolong with DAPI (Invitrogen) for nuclear  
326 visualization. Images were taken on a Zeiss Axio Observer Z1 (Zeiss) inverted microscope  
327 equipped with a 40X objective lens and an AxioCam MRm camera in ApoTome mode.

## 328 **Confocal laser scanning microscopy**

329 For the confocal microscopy analysis, the adult worms were fixed and stained as  
330 previously described (34). Confocal scanning laser microscopy was performed on a Zeiss  
331 LSM 800 microscope equipped with a 488-nm HE/Ne laser and a 470-nm long-pass filter but  
332 without the reflection mode.

## 333 **Scanning and transmission electron microscopy**

334 Scanning electron microscopy (SEM) and transmission electron microscopy (TEM)  
335 were performed to analyze ultrastructural alterations in the parasites. Adult worms or  
336 schistosomula were incubated with 25  $\mu$ M MC3935 or 0.25% DMSO for 48 or 72h, and  
337 fixed, as previously described (34). For SEM analysis, the samples were dehydrated with  
338 increasing concentrations of ethanol and then dried with liquid CO<sub>2</sub> in a critical-point dryer  
339 machine (Leica EM CPD030, Leica Microsystems, Illinois, USA) (35). Treated specimens  
340 were mounted on aluminum microscopy stubs and coated with gold particles using an ion-  
341 sputtering apparatus (Leica EM SCD050, Leica Microsystems). Specimens were then  
342 observed and photographed using an electron microscope (FEI QUANTA 250, Thermo Fisher  
343 Scientific). TEM analysis was performed on a Tecnai G2 microscope (FEI Company). Fixed  
344 specimens were washed in 0.1 M cacodylate buffer, pH 7.2; postfixed in 1% OsO<sub>4</sub> and 0.8%  
345 K<sub>3</sub>Fe (CN)<sub>6</sub>; washed in 0.1 M cacodylate buffer, pH 7.2; dehydrated in a graded acetone  
346 series (20°–100° GL) for one hour each step and embedded in Polybed 812 epoxide resin.  
347 Thin-sections (60 nm) were collected on copper grids and stained for 30 minutes in 5%  
348 aqueous uranyl acetate and for 5 minutes in lead citrate.

## 349 **Double stranded RNA interference (RNAi)**

350 The coding sequence of lysine-specific histone demethylase 1 (SmLSD1) (GenBank  
351 accession #: XM\_018797592.1) was amplified by PCR using the oligonucleotides  
352 SmLSD1\_F\_1 (5' -GTCGTCCCGTAACTCCAGTG - 3') with SmLSD1\_R\_1 (5' -  
353 AACAGGCAAGGTTTCGGACA - 3') and SmLSD1\_F\_2 (5' -  
354 TGTCACACGATGGAGAACTG - 3') with SmLSD1\_R\_2 (5' -  
355 GAAGTGTAGATTTGTCGATTGTGAA - 3') with adult parasite cDNA synthesized using 5  
356 ng of total RNA as template. These amplicons (SmLSD1\_1 and SmLSD1\_2) were used in a  
357 second PCR (nested PCR), diluted 1:500, with the oligonucleotides containing an upstream  
358 T7 tail sequence, respectively (SmLSD1\_1 amplicon with SmLSD1\_3 oligos and SmLSD1\_2  
359 amplicon with SmLSD1\_4 oligos): SmLSD1\_F\_3 (5' -  
360 GGGTAATACGACTCACTATAGGCCATCTCATACGTCGGTCCA - 3') with  
361 SmLSD1\_R\_3 (5' - GGGTAATACGACTCACTATAGGCTTTCAGCAGGCGTCAGAGTA  
362 - 3') and SmLSD1\_F\_4 (5' -  
363 GGGTAATACGACTCACTATAGGGACTCGTATGTTGCTGTCGGAG - 3') with  
364 SmLSD1\_R\_4 (5' - GGGTAATACGACTCACTATAGGCGGCTTCACGTAGACCACTT -  
365 3').

366 The *GFP* gene was used as a nonrelated dsRNA control and was amplified from pEGFP-N3  
367 with the oligonucleotides: GFP\_F\_woT7 (5' - AGCAGAGCTGGTTTAGTGAACC - 3')  
368 with GFP\_R\_woT7 (5' - TTATGATCTAGAGTCGCGGCCG - 3'). This amplicon was used  
369 in a nested PCR with the oligonucleotides containing a T7 tail: GFP\_F\_wT7 (5' -  
370 GGGTAATACGACTCACTATAGGGGGATCCATCGCCACCATGGT - 3') with  
371 GFP\_R\_wT7 (5' -  
372 GGGTAATACGACTCACTATAGGGTACTTGTACAGCTCGTCCATGCCG - 3').  
373 Double-stranded RNA (dsRNA) was synthesized from templates of amplified PCR with



374 oligonucleotides containing the T7 tail. The dsRNA was delivered by soaking the parasite  
375 couples in media containing 30 µg/mL of the desired dsRNA, and everyday, 70% of the  
376 medium was changed to a fresh medium also containing 30 µg/mL of dsRNA. At the end of  
377 the 2<sup>nd</sup>, 4<sup>th</sup>, and 7<sup>th</sup> days of incubation, parasites were collected, washed twice in PBS and  
378 stored in RNAlater (Ambion) until RNA extraction. At the end of the 2<sup>nd</sup>, 4<sup>th</sup> and 7<sup>th</sup> days of  
379 incubation the total number of eggs, the number of parasites attached to the plate and the  
380 number of couples still paired were quantified. For the H3K4me1 and H3K4me2 western  
381 blotting, parasites were collected on the 7<sup>th</sup> day of incubation with dsRNA and stored in PBS  
382 at -80 °C. The viability of the parasites was determined on the 7<sup>th</sup> day of incubation as  
383 described above. Male and female adult worms were ground with glass beads in liquid  
384 nitrogen for 5 minutes. RNA extraction and cDNA synthesis were performed as described  
385 above. qPCR results were analyzed by the comparative Ct method. Real-time qPCR data were  
386 normalized in relation to the level of expression of the Smp\_090920 (Fwd 5' –  
387 CACCAGCTCATCATAAATAATCCA – 3', Rev 5' – TAGCATCCTGAAAGCCACGA –  
388 3') and Smp\_062630 (Fwd 5' – GGAATGATGTGGCCGATAGT – 3', Rev 5' –  
389 CGCAGAGATTGGCTAAATTG – 3') reference genes.

### 390 **RNA-Seq data analysis**

391 The general outline of the bioinformatics pipeline used for the analysis of the RNA-  
392 Seq data is completely described in Pereira et al. (36), including the three different statistical  
393 approaches that were used to obtain lists of differentially expressed genes, and considering as  
394 the final set only those genes that were listed at the intersection of the three sets. We used the  
395 same versions of genome and transcriptome annotation, including the use of a metagenes  
396 transcriptome to deal with isoforms, as previously described (36). All software parameters  
397 were as described (36) except for Trimmomatic (37) HEADCROP 12 and MAXINFO 60,  
398 since we decided to prioritize longer reads. Each replicate sample of adult worms has

399 generated from 26 to 39 million paired-end 150-bp reads; for schistosomula, a total of 30 to  
400 40 million reads was obtained per replicate sample.

## 401 **Results**

### 402 ***Schistosoma mansoni* lysine specific-demethylase 1**

403         The *Schistosoma mansoni* LSD1 (SmLSD1) contains all three canonical structural,  
404 and functional domains (SWIRM, amino-oxidase-like and TOWER domains) (Fig 1A) found  
405 in the LSD1 protein family. We examined in detail the protein alignment between SmLSD1  
406 and human LSD1 (hLSD1) (Supplementary Fig S2), particularly since the latter is a well-  
407 defined drug target (18) and carried out a limited phylogenetic study including further  
408 orthologs. In this regard, our phylogenetic tree revealed that the SmLSD1 protein was closer  
409 to human LSD1 than to plant or nematode LSD1 (Fig 1B). It is worth noting that among the  
410 five LSD1 homologs tested only SmLSD1 presented unique sequences within all LSD1  
411 functional domains (Fig 1A, purple segments and Supplementary Figure S2, dashed lines),  
412 which could be explored to develop a *S. mansoni*-selective drug.

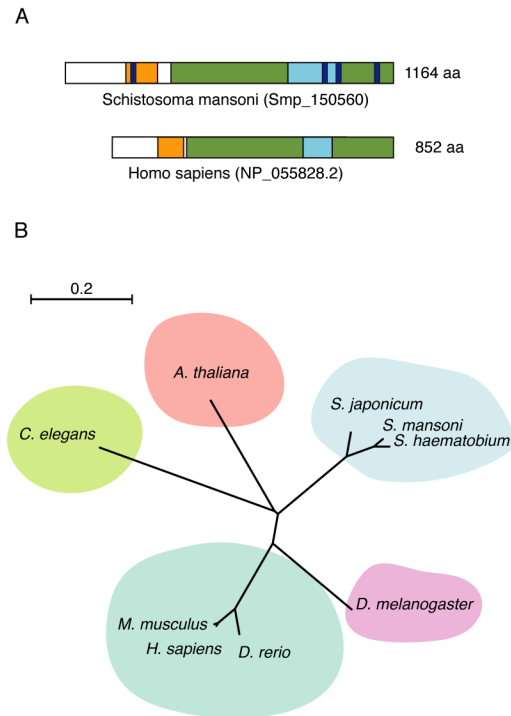

413

414 **Figure 1. Overview of SmLSD1 protein domains and conservation.** (A). Schematic representation  
415 of the full-length SmLSD1 protein (Smp\_150560, top scheme), depicting the conserved functional  
416 domains: the SWIRM domain (orange), amine oxidase-like domain (green), the TOWER domain  
417 (blue), and schistosome unique sequences (purple). The full-length of the human LSD1 protein  
418 (bottom scheme) is also shown for comparison. (B). Unrooted phylogenetic tree representation was  
419 made using the ClustalW2 program and visualized with <https://itol.embl.de/>. Tree  
420 scale: 0.2

## 421 **Viability of *Schistosoma mansoni* after MC3935 treatment**

422 Schistosomula were obtained by mechanical transformation of cercariae, and adult  
423 worms were recovered by perfusion of infected hamsters (Fig 2A). We screened a series of  
424 LSD1 inhibitors (all these small compounds were synthesized based on the scaffold of  
425 tranlycypromine (TCP), a well-tested irreversible LSD1 inhibitor) to evaluate their  
426 schistosomicidal activity. Interestingly, all compounds at a final concentration of 25  $\mu$ M  
427 showed toxicity against the juvenile form of schistosomula at 72 h (Supplementary Fig S3A)  
428 or adult worms at 96 h of cultivation (Supplementary Fig S3B). Interestingly, TCP showed

429 the least toxic activity, whereas MC3935 was the most potent compound (Supplementary Fig  
430 S3A and B). Therefore, MC3935 was chosen for all further analyses in this study. We showed  
431 that MC3935 was able to inhibit the catalytic activity of the recombinant human LSD1 protein  
432 (Supplementary Fig S1B), revealing a 1,000 fold higher inhibitory activity than TCP, proving  
433 it as a *bona fide* LSD1 inhibitor. The toxic effect of MC3935 on schistosomula or adult worm  
434 pairs was further confirmed (Fig 2 B and C and Supplementary Fig S3C). A significant loss of  
435 viability at 10  $\mu$ M and a complete loss of viability (what we judged death) at 25  $\mu$ M MC3935  
436 was observed in schistosomula or adult worms after cultivation for 72 or 96 h, respectively  
437 (Supplementary Fig S3C). These results were confirmed with videos (Supplementary videos  
438 S1-S4), which showed nearly 100% of the schistosomula had a complete lack of motility,  
439 high granularity and altered body shape (supplementary video S2) when compared to healthy  
440 schistosomula that were treated with DMSO only (supplementary video S1). MC3935-  
441 treated-adult worms also showed significant alterations when compared to the control (Fig 2D  
442 and Supplementary video S3), which included unpairing, lack of adherence, extremely low  
443 motility, vitellaria involution and no egg laying (Fig 2D and supplementary video S4). In  
444 order to evaluate whether the lack of eggs (Fig 2D; Egg laying) was exclusively due to the  
445 separation of the worms (Fig 2D; Pairing), we performed an additional experiment in which  
446 only adult worms that were kept coupled were maintained in culture, followed by egg  
447 counting. Worm pairs that were not treated, or treated with DMSO laid a significant number  
448 of eggs, while worm pairs that received the treatment of MC3935 laid no eggs whatsoever  
449 (Supplementary Fig S4A and B).

450

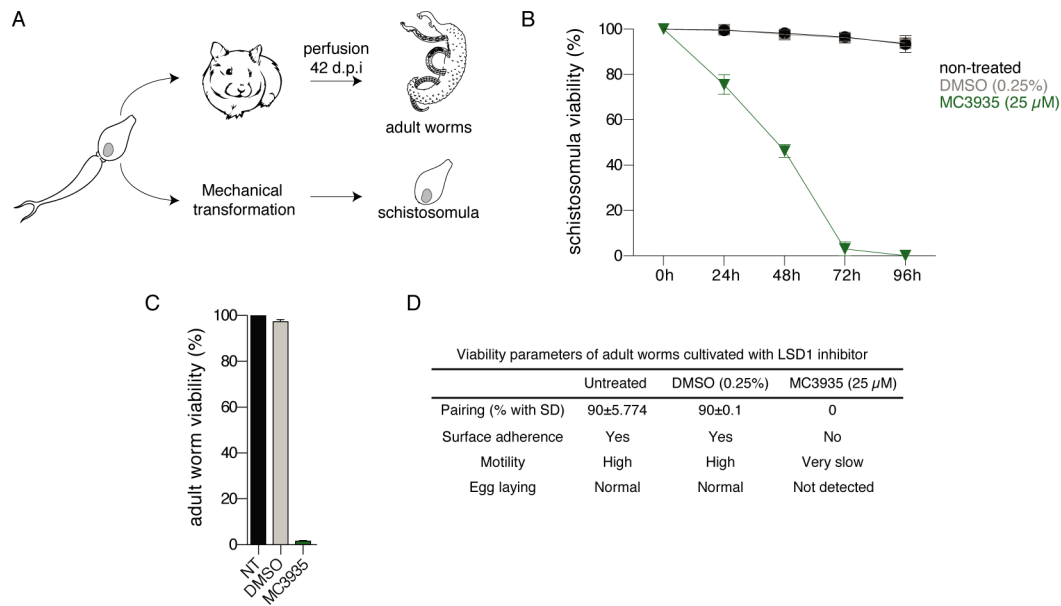

451

452 **Figure 2. LSD1 inhibition is detrimental to *Schistosoma mansoni* survival.** (A). Simplified  
 453 scheme of the acquisition of the two developmental stages of the parasite used in this study. Cercariae  
 454 were harvested from infected snails and used to either infect hamsters or mechanically transformed  
 455 into schistosomula for *in vitro* culture. Hamsters were perfused 42 - 49 days postinfection to harvest  
 456 adult worm pairs. (B). The relative ATP dosage (%) of schistosomula treated with 25 μM MC3935  
 457 (green line) was measured every 24 h (up to 96 h). Schistosomula given DMSO or nothing are shown  
 458 in gray and black lines, respectively. (C) Relative ATP dosage (%) of adult worm pairs treated with  
 459 25 μM MC3935 for 96 h. NT, nontreated adult worm pairs. The results of three independent  
 460 experiments are shown, and error bars represent the standard deviation (SD). (D) Evaluation of the  
 461 viability of adult worm pairs treated with DMSO or 25 μM MC3935 for 96 h. Several parameters of  
 462 adult worm viability were monitored daily until day 4, using an optical microscope equipped with a  
 463 digital camera. Details for these classifications are described in the methods section. These viability  
 464 parameters were reviewed and scored by two independent observers. Videos of the control or  
 465 MC3935-treated worms to confirm the described scores are available (in Supplementary videos).

## 466 **Molecular docking and catalytic inhibition of SmLSD1 by MC3935**

467 Since no crystal structure of SmLSD1 is yet available, a homology model of the  
 468 parasite's enzyme was first generated using an available crystal structure of the orthologous  
 469 human LSD1. By analyzing the reported crystal structures of hLSD1 in complex with  
 470 covalently bound tranlycypromine (TCP) derivatives, two crystal structures were found to be  
 471 most relevant: a crystal structure of the N5 adduct of the highly analogous MC2584, which

472 only lacked the ethynyl group found in MC3935, and the crystal structure with the N5 adduct  
473 of the bulky tranlycypromine derivative MC2580 (PDB IDs 2XAQ and 2XAS; respectively  
474 (29)). The latter crystal structure (PDB ID 2XAS) was preferred for the use as a template for  
475 the homology model since the conformation of residues Glu682 and Asp669 resulted in a  
476 more open binding site. Sequence alignment of SmLSD1 and hLSD1 showed an overall  
477 sequence identity of 44.1%, while the binding site of the FAD-ligand adduct shared an 80.4%  
478 sequence identity. In order to predict the binding mode of MC3935 to SmLSD1, the N5  
479 adduct of this tranlycypromine derivative with the flavin ring of FAD was first generated  
480 similar to the N5 adduct of the analogous MC2584, and docking was subsequently performed  
481 into the homology model of SmLSD1. The obtained docking pose showed that the N5 adduct  
482 of MC3935 adopted a similar orientation in the binding site as observed with MC2584 (Fig  
483 3A) with the ethynyl group embedded between Glu682 and Asp669. Notably, the binding site  
484 of SmLSD1 accommodating the tranlycypromine part of the adduct shared a 100% homology  
485 with the hLSD1 counterpart (Fig 3B).

486 We next performed western blot analysis and showed that schistosomula or adult  
487 worms treated with MC3935 displayed higher band intensities of H3K4me1 or H3K4me2  
488 marks when compared to the DMSO controls (Fig 3C), confirming the inhibition of SmLSD1  
489 demethylase activity. Of note, the increase in H3K4me1 or H3K4me2 methylation was not  
490 due to the downregulation of SmLSD1 transcription (Supplementary Fig S5, qPCR graphs in  
491 A and B). Together, these data confirm that MC3935 inhibited SmLSD1 demethylase activity.  
492 Importantly, MC3935 treatments did not alter the H3K4me3 mark in schistosomula or adult  
493 worms (Supplementary Fig S5, western blots in A and B), pointing to a selective inhibition of  
494 LSD1-specific histone marks.

495

496

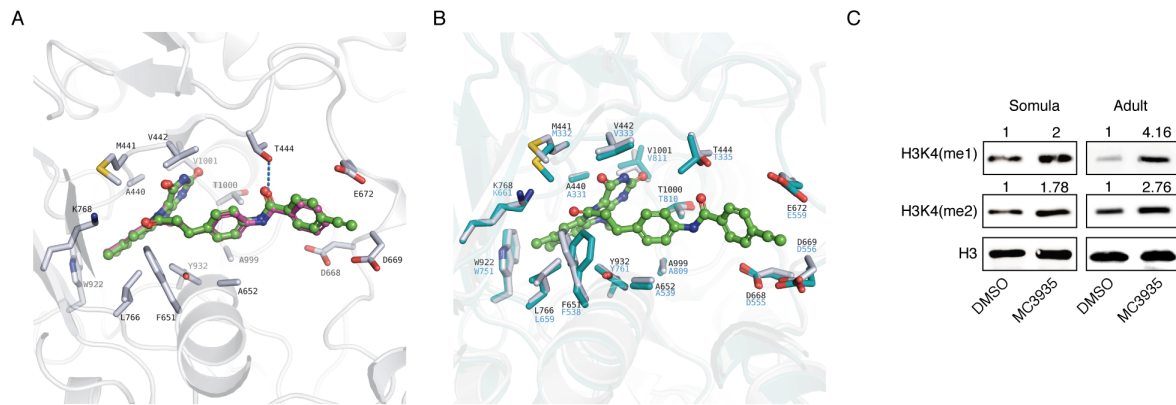

497

498 **Figure 3. MC3935 binds to the catalytic pocket of SmLSD1 and inhibits its demethylase activity.**

499 (A). *In silico* molecular docking pose of the N5 adduct of MC3935 (in green) in the homology model  
500 of SmLSD1. The experimentally determined binding mode of the analogous MC2584 obtained by the  
501 superposition with the corresponding hLSD1 crystal structure (PD ID 2XAQ) is shown in purple. Only  
502 side chains of the SmLSD1 binding site are shown (white sticks). (B). Overlay of the SmLSD1  
503 homology model (white sticks) showing the predicted binding mode of the MC3935 adduct with  
504 hLSD1 (cyan sticks; PDB ID 2XAS). (C) Western blot of total protein extracts from 72-hour-treated  
505 schistosomula (left panels) or 96 hour-treated adult worm pairs (right panels). Monoclonal antibodies  
506 against H3K4me1, H3K4me2 and H3 (as loading control) were used. Quantification of the bands  
507 (shown above each image) was done by densitometry (ImageJ, NIH software) normalized by the  
508 intensity of the H3 band. Western blots were performed from 5 independent biological replicates and  
509 one representative is shown here.

### 510 **Apoptosis in *S. mansoni* after SmLSD1 inhibition**

511 The treatment of schistosomula with MC3935 significantly induced apoptosis, as  
512 detected by the 8-fold increase in the activities of caspases 3 and 7 (Fig 4A). In addition, the  
513 TUNEL assay indicated extensive double-strand DNA breaks (Fig 4B), as revealed by the  
514 green staining of the whole body of the worm treated with the inhibitor. Worms treated with  
515 DMSO showed no apoptotic activity, whatsoever (Fig 4A and B). These results are in  
516 agreement with our data from the ATP viability assay (Fig 2B, Supplementary Fig S3C) and  
517 our observations taken from the optical microscope (Supplementary videos S1 and S2).

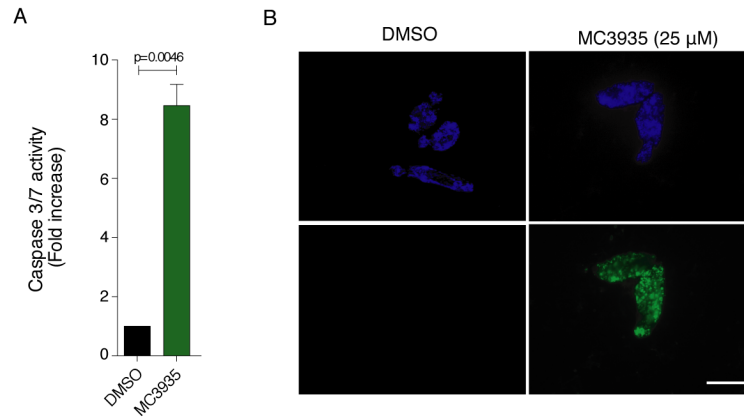

518

519

520 **Figure 4. Inhibition of SmLSD1 triggers apoptosis.** Twenty thousand schistosomula were cultivated  
521 in the presence of DMSO or 25  $\mu$ M MC3935 for 72 h. (A) Caspase 3/7 activity was significantly  
522 increased in MC3935-treated parasites (green bar). (B) TUNEL assay of schistosomula incubated for  
523 72 h with DMSO (left panels) or 25  $\mu$ M MC3935 (right panels). Green parasites (lower panel) indicate  
524 double-strand DNA breaks. DAPI stains nuclear DNA, seen in blue (top panels). Scale bar: 50  $\mu$ m.

#### 525 **Tegumental damage and ultrastructural abnormalities of schistosomula after SmLSD1** 526 **inhibition**

527 The results from our scanning electron microscopy clearly showed that inhibition of  
528 SmLSD1 by MC3935 induced severe erosions and fissures in the tegument of schistosomula  
529 (Fig 5B and D). Worms treated with DMSO revealed the typical healthy status of  
530 schistosomula (panel A), showing preserved tegumental spines (panel C). These images  
531 corroborate our conclusions that the MC3935 treatment led to schistosomula death. In this  
532 respect, it is reasonable to assume that the survival of these worms (note in panels B and D  
533 the depth of tegumental damage) could not be rescued even by the eventual withdrawal of the  
534 inhibitor.

535



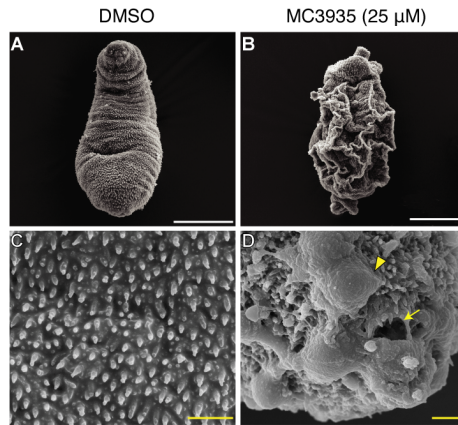

536

537

538 **Figure 5. Inhibition of SmLSD1 leads to tegumental damage of schistosomula.** Schistosomula  
539 were treated with 0.25% DMSO (left columns) or 25  $\mu$ M MC3935 (right columns) for 48 h. Scanning  
540 electron microscopy (SEM) images of the tegument in lower (A and B) and higher magnification (C  
541 and D). Severe tegumental erosions (arrowhead), and fissures (arrow) are seen at higher magnification  
542 (D). Scale bars: white (5  $\mu$ m) and yellow (1  $\mu$ m).

543 Transmission electron microscopy of DMSO-treated schistosomula revealed preserved  
544 ultrastructures in the worms (Fig 6, panels A, C, E, G and I), such as tegumental spines (black  
545 arrows), outer tegument (\*), tegument basal lamina (b), circular muscle (cm), longitudinal  
546 muscle (lm), mitochondria (m) and nuclei (n). In MC3935-treated schistosomula, extensive  
547 ultrastructural disorganization of the tegument was seen, such as a lack of the outer tegument  
548 (Fig 6, panel B, asterisks) and tegumental spines (panel B, black arrow). Significant loss of  
549 the muscle layers was also observed (compare lm and cm in panels A, C with panels B, D).  
550 Large vacuoles were seen in the more external region of the tegument of MC3935-treated  
551 parasites (tv in panel D). Additionally, these internal vacuoles contained what seemed to be  
552 cellular debris (panel D, #), which could be an indication of tissue degradation and cell death.  
553 Panel F shows significant thickening and higher electron density of the outer tegument,  
554 associated with the appearance of projections (white asterisk). Loosening and disorganization  
555 of the muscle fibers were also observed (panel F and H, lm, and cm) as were different  
556 projections of the spines in the outer tegument (panel H, white asterisks). Control parasites  
557 (panel I) showed normal and preserved mitochondria (m), always associated with muscle

558 fibers while MC3935-treated parasites (panel J) showed smaller mitochondria (m) that  
559 appeared to have less well-defined cristae, and enveloped by membranous structures, which  
560 could be an indication of leftover muscle fibers, and they were close to myelin fibers (mf).

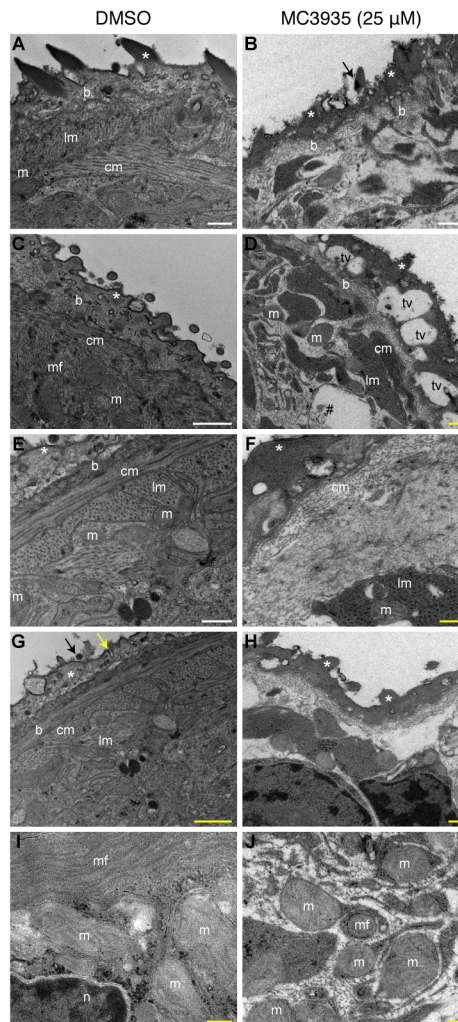

561  
562 **Figure 6. Inhibition of SmLSD1 leads to ultrastructural abnormalities in schistosomula.**  
563 Transmission electron microscopy (TEM) of schistosomula treated with 0.25% DMSO (left column,  
564 panels A, C, E, G and I) or 25 μM MC3935 (right column, panels B, D, F, H and J) for 48 h. Symbols  
565 are as follows: tegumental spines (black arrows), outer tegument (\*), tegument basal lamina (b),  
566 circular muscle (cm), longitudinal muscle (lm), mitochondria (m) and nucleus (n). In MC3935-treated  
567 schistosomula, an ultrastructural disorganization of the tegument is seen, lacking the outer tegument  
568 and tegumental spines (panel B, black arrow). A complete lack of the muscle layers (lm or cm) is also  
569 noted (panel B). Large vacuoles are observed in the more external region of the tegument of MC3935-  
570 treated parasites (panel D, tv). Internal vacuoles contain cellular debris (panel D, #). Significant  
571 thickening and higher electron density of the outer tegument is present, associated with the appearance  
572 of projections (panel F, white asterisk). Loosening and disorganization of the muscle fibers (panel F

573 and H, lm and cm) and uncommon projections of the spines in the outer tegument (panel H, white  
574 asterisks) are observed. Control parasites (panel I) show normal and preserved mitochondria (m),  
575 always associated with muscle fibers (lm or cm). MC3935-treated parasites (panel J) lack muscle  
576 fibers, and they show smaller mitochondria (m) that appear to have less defined cristae, to be  
577 enveloped by membranous structures and to be close to myelin fibers (mf). Scale bars: white (5  $\mu$ m)  
578 and yellow (1  $\mu$ m).

## 579 **Phenotypic defects of adult *S. mansoni* after SmLSD1 inhibition**

580 Analysis of the adult male tegument and its oral sucker by scanning electron  
581 microscopy showed significant alterations upon MC3935 treatment (Fig 7, right panels),  
582 when compared to the control worms (Fig 7, left panels). A detailed inspection of the SEM  
583 images revealed extensive damage in the dorsal tegument of the male worms that were treated  
584 with the LSD1 inhibitor, with the presence of a large number of blisters (Fig 7B and D,  
585 yellow arrowheads), as well as fissures and holes in the tubercles (Fig 7B and D, yellow  
586 arrows). Blisters and fissures were also seen in the male oral sucker (Fig 7F, yellow arrows,  
587 and arrowheads). Confocal laser scanning microscopy (CLSM) showed important alterations  
588 of the sexual organs of MC3935-treated male or female parasites (Fig 7H and J). It is worth  
589 noting the deleterious effect of the LSD1 inhibitor in the involution of the ovary, leading to a  
590 reduced number of mature or immature oocytes (Fig 7, compare panels G and H). The  
591 inhibitor also generated severe disorganization of the testicular lobes, culminating in a  
592 significantly reduced number of spermatocytes (Fig 7, compare panels I and J). Since the  
593 treatment of MC3935 significantly affected the sexual organs of both male and female worms,  
594 one should expect that egg production would be severely compromised. Supplementary  
595 videos S3 and S4 display the described phenotypic abnormalities, which explain the egg  
596 laying impairment in MC3935-treated worms. Indeed, inspection of egg laying by the worms  
597 cultivated in the presence of MC3935 revealed an almost complete lack of eggs  
598 (Supplementary Fig S4A and B and Supplementary videos S3 and S4; in the videos, note the

599 presence of eggs in DMSO-treated worms and a complete lack of eggs in MC3935-treated  
600 parasites) a few hours after the addition of the inhibitor. It is also worth noting the involution  
601 of the vitellaria in MC3935-treated females (Supplementary video S4).

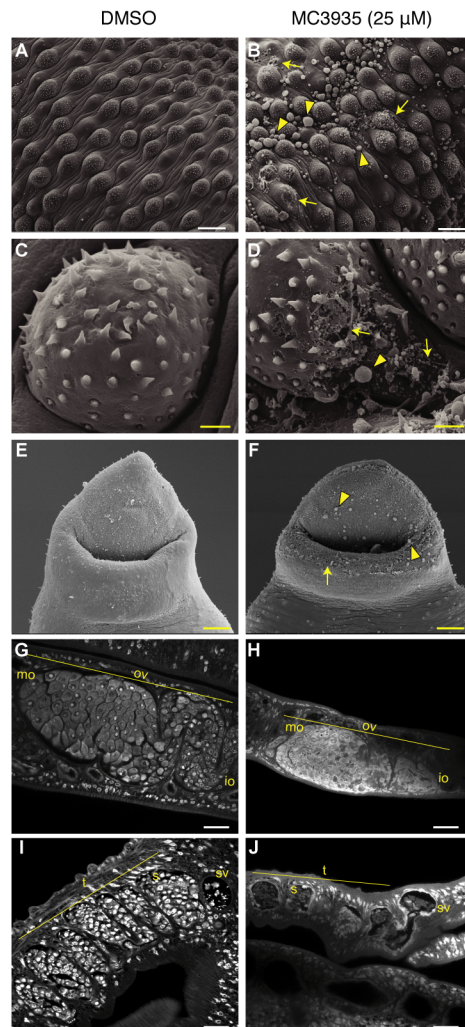

602

603 **Figure 7. Inhibition of SmLSD1 leads to tegumental damage and reproductive organ involution**  
604 **in adult schistosomes.** Ten adult worm pairs were cultivated in the presence of DMSO (left column)  
605 or 25 μM MC3935 (right column) for 72 h. Scanning electron microscopy (SEM) images from the  
606 dorsal region of male worms show damage to the tegument (B), tuberculous (D) and oral sucker (F)  
607 compared to controls (A, C and E). Yellow arrows point to fissures and arrowheads point to blisters.  
608 Scale bar: 2 μm (yellow). Confocal laser scanning microscopy (CLSM) of ovaries (G and H) and testes  
609 (I and J) from control and MC3935-treated, respectively. OV: ovary; mo: mature oocytes; io: immature  
610 oocytes; (t) testicular lobes; sv: seminal vesicle; s: spermocytes. Scale bars: 20 μm (white) and 2 μm  
611 (yellow).

## Changes in gene expression profile upon SmLSD1 inhibition

We performed RNA sequencing (RNA-Seq) analysis to evaluate the effect of LSD1 inhibition on global gene transcription in *S. mansoni*. Unsupervised hierarchical clustering analysis of RNA-seq data depicted the changes in global gene expression profile in males, females, or schistosomula upon treatment with MC3935 (Fig 8). Interestingly, inhibition of SmLSD1 significantly modulated 3608 transcribed genes in male, female or schistosomula, with 1964 being downregulated, and 1644 being upregulated (Fig 8A). The highest modulation of gene expression was observed in male worms, for either up- or downregulation (Fig 8A, purple in the Venn diagram), followed by female worms (Fig 8A, pink in the Venn diagram), and schistosomula (Fig 8A, red in the Venn diagram). Importantly, when we analyzed commonly regulated genes in male, female, or schistosomula, we found 220 and 50 genes down- or upregulated, respectively (Fig 8A). The complete lists of significantly upregulated genes in each female, male or schistosomula (Tables S1-S3), downregulated genes in each females, males or schistosomula (Tables S4-S6), down- or upregulated genes in common between females and males (Tables S7 and S8, respectively) are presented in the supporting information. It is noteworthy that in schistosomula, a smaller number of consensus of differentially expressed genes (DEGs) was detected when compared with adult worms (Fig. 8A).

A clear profile of the differential gene expression between control and MC3935-treated parasites is depicted in the heatmap (Fig. 8B), which confirmed that the treatment led to a significant change in the regulation of genes in females, males and schistosomula, with many genes being either up- (Fig. 8B, red) or downregulated (Fig. 8B, blue).

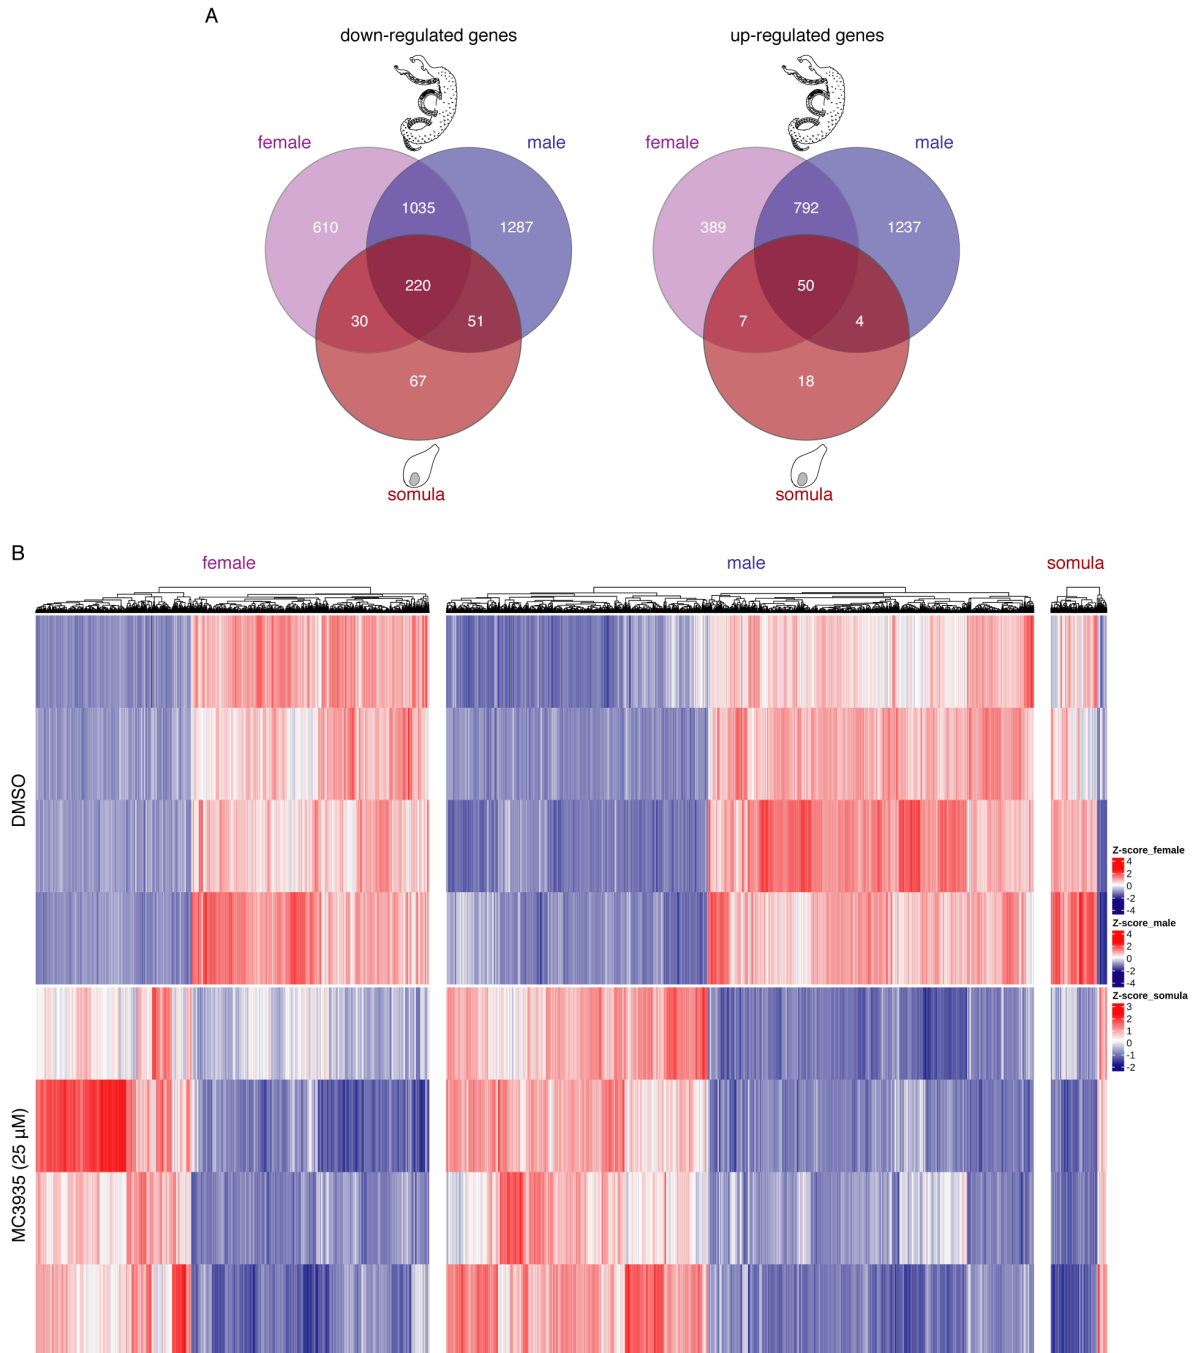

**Figure 8. Inhibition of SmLSD1 triggers genome-wide transcriptional deregulation.** RNA-seq analysis of female and male worms and schistosomula that were cultivated in the presence of DMSO (control) or MC3935 (25  $\mu$ M) for 48 hours. (A) Venn diagrams of the number of genes that were detected as differentially expressed among female, male and schistosomula. The numbers at the intersections (darkest red) of the diagrams represent genes commonly affected in the presence of MC3935 among females, males and schistosomula (220 downregulated genes and 50 upregulated genes). (B) The heatmaps show the hierarchical clustering of differentially expressed genes (columns) in four biological replicates (lines) of female and male worms, and schistosomula, either for controls

or for treated parasites, as indicated on the left side of the heatmaps. Blue lines, downregulated genes. Red lines, upregulated genes. Gene expression levels are shown as Z-scores, which represent the number of standard deviations above (red) or below (blue) the mean expression value among treated and control samples for each gene; the expression level Z-scores are color-coded as indicated on the scale at the right side of the heatmap.

A closer look at the twenty most differentially expressed genes in females, males or schistosomula revealed that inhibition of SmLSD1 by MC3935 changed the levels of expression of genes belonging to different critical biological processes, including protein and lipid degradation, RNA processing, calcium and sodium homeostasis, antioxidants and transcription factors (Tables S9-S11). Within this list, genes encoding proteases stood out as being downregulated in MC3935-treated schistosomula, males and females as compared to DMSO-treated parasites (Tables S9-S11, shaded in green). Genes encoding protease inhibitors were upregulated in females and males (Tables S9 and S10, shaded in dark green). Importantly, genes of the digestive system of *S. mansoni* were found down- or upregulated (Tables S9-S11, shaded in green with \*).

Genes encoding kinases and phosphatases were upregulated in treated females and males (Tables S9 and S10, shaded pink and yellow, respectively). Overall, the analysis of the twenty most differentially expressed genes in treated males revealed a more heterogeneous gene expression profile (Table S10). Of note, in MC3935-treated schistosomula, a significant number of genes encoding proteins involved in RNA metabolism were upregulated (Table S11, shaded in blue). Downregulated genes encoding proteases stood out in treated schistosomula (Table S11, shaded in green).

### **Knockdown of the SmLSD1 gene**

We conducted dsRNAi experiments in adult worm pairs and were able to achieve 70% silencing of SmLSD1 transcription at day 7 (Supplementary Fig S6A and B). Western blot

analysis of protein extracts from silenced adult worm pairs revealed a 2-fold inhibition of SmLSD1 demethylase activity (Supplementary Fig S6C). By monitoring the behavior of the worms on a daily basis, we clearly observed progressive harm in whole-worm physiology during SmLSD1 silencing, which culminated in significant unpairing of male and female worms, a decrease of nearly 50% in the number of laid eggs, low motility and compromised surface adherence by the oral sucker of male worms (Supplementary Fig S6D - F). Silencing of SmLSD1 promoted damage to the oral sucker of male worms (Supplementary Fig S6G). Of note, the silencing of the parasites with the control dsRNAi showed no decrease in SmLSD1 gene expression or activity and no deleterious effects in the worms (Supplementary Fig S6, dsGFP)

## Discussion

Lysine-specific demethylase 1 (LSD1) is an epigenetic enzyme that oxidatively cleaves methyl groups from mono and dimethyl Lysine 4 of histone H3 (H3K4me1/2) and can contribute to gene silencing (38–41). Since its discovery, LSD1 histone demethylase activity has been investigated as a pharmacologic target for cancer and other diseases. As part of a continuing effort of several different investigators to identify epigenetic modifications as therapeutic targets to control schistosomiasis, a recent paper published during our study also identified *S. mansoni* LSD1 (SmLSD1) as an additional promising drug candidate (17). In the present study, we provide evidence that SmLSD1 plays important biological roles in the physiology of *S. mansoni* and that inhibition of SmLSD1 by a novel, selective, and potent LSD1 synthetic inhibitor MC3935 is detrimental to the survival of juvenile and adult worms.

MC3935 was synthesized based on the scaffold of the nonselective and irreversible monoamine oxidase (MAO) inhibitor tranylcypromine (TCP) (29,42). Tranylcypromine is a mechanism-based suicide inhibitor of MAO and LSD1; it covalently binds to the FAD cofactor embedded within the protein, thus abolishing enzymatic catalysis (43). Importantly,



MC3935 showed a 1,000 fold higher inhibitory activity than TCP, *in vitro*. In addition, our *in silico* molecular docking indicated that MC3935 could indeed be an effective SmLSD1 inhibitor and that the inhibition also relied on the amino-oxidase-like catalytic domain. Toxicity assays on *S. mansoni* parasites using each of our 11 synthetic putative LSD1 inhibitors, as well as TCP, revealed MC3935 as the most powerful, with TCP showing the lowest toxicity toward the worms. This was a surprising result if we consider that both MC3935 and TCP (44) should adopt a similar orientation in their binding to the catalytic site of SmLSD1, based on our *in silico* molecular docking. However, one could always assume that the lack of toxicity of TCP was due to its lower permeability to the tegument of *S. mansoni* or that it is more metabolically labile. Indeed, MC3935 fills better the catalytic tube of the enzyme than TCP, due to its additional ethynylbenzamide portion, which allows additional interaction into the tube. Importantly, our western blot analyses indicated that MC3935 specifically inhibited H3K4 mono- and dimethylation, which are known LSD1 targets, but not H3K4 trimethylation, a mark that is targeted by the histone demethylases of the Jumonji family (doi: 10.1101/gad.1652908).

Genetic studies in numerous models have suggested that LSD1 plays a significant role in developmental processes (45). LSD1 has also been reported to have a role in the DNA damage response (46), repression of mitochondrial metabolism, lipid oxidation energy expenditure programs (47,48), and smooth muscle regeneration (49). Additionally, germline murine knockouts exhibit embryonic lethality before E7.5: the egg cylinder fails to elongate and gastrulate, resulting in development arrest (50). In *C. elegans*, the homolog spr-5 regulates Notch signaling (51,52), and maintains transgenerational epigenetic memory and fertility (53). The yeast spLsd1/2 (54) and *Drosophila* Su(var)3-3 (55) homologs regulate gene silencing, which is required to guarantee normal oogenesis (56) and spermatogenesis (57) in *Drosophila*.

Taking into account the phenotypic effects observed in schistosomula or adult worms under the treatment with the LSD1 inhibitor MC3935, it can be assumed that SmLSD1 also plays important roles in the development and homeostasis of the tegument, muscle and sexual organs of *S. mansoni*. Although inhibition of SmLSD1 can have more pronounced effects on many other key biological processes or structures in *S. mansoni*, the tegument disruption would alone represent a desirable LSD1 target. The tegument of *S. mansoni* plays a crucial role in its protection against the host immune system (58); it is capable of absorbing nutrients and molecules, as well as excreting metabolites and synthesizing proteins (59,60). Inhibition of SmLSD1 activity, either by irreversible MC3935 binding (Fig 3A and B) or by partial knockdown of the SmLSD1 gene (Supplementary Fig S6A and B), generated pronounced damage in schistosomula or adult worms (Fig 5, Fig 7, and Supplementary Fig S6), which likely made a major contribution to the observed mortality of the parasites within a short period of time (Fig 2, Fig 4, Supplementary Fig S3, Supplementary Fig S6, and Supplementary videos).

The musculatory activity is essential in several aspects of *S. mansoni* biology and physiology, including infection, pairing, feeding, regurgitation, reproduction and egg laying (61–63). Our transmission electron microscopy revealed a complete lack of muscle layers in schistosomula treated with the LSD1 inhibitor (Fig 6), which was accompanied by phenotypic defects observed in treated-worms, such as lack of motility, sucker adherence, egg laying and vitellaria contraction (Fig 2, Supplementary Fig S6 and Supplementary video S4), that could be related to the compromised muscle structures.

Interestingly, the role of LSD1 in oogenesis and spermatogenesis seems to be conserved among different organisms, including human, *C. elegans*, *Drosophila*, and *S. mansoni* (this paper). Our confocal microscopy revealed significant alterations in the sexual organs of treated worm pairs, such as a reduced number of spermatocytes and oocytes (Fig 7H

and J). These data are in agreement with the incapacity of the worms to produce eggs, even when remaining paired during the treatment (see Supplementary Fig S4).

Several diseases have been associated with aberrant histone methylation/demethylation patterns. Thus, considering that juvenile or adult *S. mansoni* are highly transcriptionally active and that SmLSD1 is expected to control the expression of a variety of different genes to maintain the homeostasis of the parasites, we compared their global transcriptional profiles after incubation with a sublethal dose of MC3935. Our RNA-seq analysis revealed that inhibition of SmLSD1 led to the differential expression of genes involved in several different biological processes. These data suggest that SmLSD1 is recruited to target gene promoters by different transcription factors. Among the genes that were downregulated upon SmLSD1 inhibition in schistosomula, females and males, several proteases stood out (Tables S9-S11, shaded in green), mainly from the cathepsin family, including two hemoglobinas in female worms. This is an important finding considering that proteases are key components of the pathogenicity of the parasite; they facilitate tissue penetration and determine the nutritional sources of the parasite within intermediate and human hosts (64). Importantly, two protease inhibitors were upregulated in females and males (Tables S9 and S10, shaded in dark green). That SmLSD1 controls the expression of genes of the digestive system of female or male worms was supported by the fact that a number of genes encoding enzymes or proteins of the digestive tract of the parasite (65) had modified expression in treated parasites (Tables S9-S11, shaded in green and with \*). In this regard, it is noteworthy that blood digestion seemed to be severely compromised in females (see Supplementary Video S4).

Interestingly, we identified the SMDR2 gene as significantly downregulated in female worms treated with the LSD1 inhibitor (Table S9, shaded in green and with #). SMDR2 is the schistosome homolog of P-glycoprotein (PgP) (66), an ATP-dependent efflux pump, and its

downregulation upon treatment might be involved in the high toxicity of MC3935 observed in females (see Supplementary Video S4).

Importantly, a significant number of proteins involved in RNA metabolism seemed to be specifically upregulated in schistosomula (Table S11, shaded in blue). This finding is of great importance since, although histone methylation has been only recently coupled to RNA processing (67), this is the first report suggesting a role for LSD1 in regulating RNA metabolism.

The epigenetic regulation of chromatin affects many fundamental biological pathways. Therefore, the realization that the deregulation of chromatin is harmful to *S. mansoni* should spark significant efforts to develop selective epigenetic drugs against schistosomiasis. The present study further promotes SmLSD1 as a strong candidate.

## **Acknowledgments**

We thank Mr. Paulo Cesar dos Santos (Fiocruz, Rio de Janeiro, Brazil) for providing *S. mansoni* cercariae. We are in debt to Dr. Geetha Venkatesh for critical comments and valuable discussions on the bioinformatics analysis.

## References

1. Colley DG, Bustinduy AL, Secor WE, King CH. Human schistosomiasis. *Lancet* [Internet]. 2014 Jun [cited 2019 Sep 5];383(9936):2253–64. Available from: <https://linkinghub.elsevier.com/retrieve/pii/S0140673613619492>
2. Lewis FA, Tucker MS. Schistosomiasis. In Springer, New York, NY; 2014 [cited 2019 Jun 17]. p. 47–75. Available from: [http://link.springer.com/10.1007/978-1-4939-0915-5\\_3](http://link.springer.com/10.1007/978-1-4939-0915-5_3)
3. Cioli D, Basso A, Valle C, Pica-Mattoccia L. Decades down the line: the viability of praziquantel for future schistosomiasis treatment. *Expert Rev Anti Infect Ther* [Internet]. 2012 Aug 10 [cited 2019 Sep 5];10(8):835–7. Available from: <http://www.tandfonline.com/doi/full/10.1586/eri.12.70>
4. Cioli D, Pica-Mattoccia L, Basso A, Guidi A. Schistosomiasis control: praziquantel forever? *Mol Biochem Parasitol* [Internet]. 2014 Jun [cited 2019 Sep 5];195(1):23–9. Available from: <https://linkinghub.elsevier.com/retrieve/pii/S0166685114000759>
5. Pica-Mattoccia L, Doenhoff MJ, Valle C, Basso A, Troiani A-R, Liberti P, et al. Genetic analysis of decreased praziquantel sensitivity in a laboratory strain of *Schistosoma mansoni*. *Acta Trop* [Internet]. 2009 Jul [cited 2019 Sep 5];111(1):82–5. Available from: <https://linkinghub.elsevier.com/retrieve/pii/S0001706X09000308>
6. Liang Y-S, Wang W, Dai J-R, Li H-J, Tao Y-H, Zhang J-F, et al. Susceptibility to praziquantel of male and female cercariae of praziquantel-resistant and susceptible isolates of *Schistosoma mansoni*. *J Helminthol* [Internet]. 2010 Jun 18 [cited 2019 Sep 5];84(2):202–7. Available from: [https://www.cambridge.org/core/product/identifier/S0022149X0999054X/type/journal\\_article](https://www.cambridge.org/core/product/identifier/S0022149X0999054X/type/journal_article)
7. Yang GJ, Lei PM, Wong SY, Ma DL, Leung CH. Pharmacological inhibition of LSD1 for cancer treatment. Vol. 23, *Molecules*. MDPI AG; 2018.
8. Carneiro VC, de Abreu da Silva IC, Torres E JL, Caby S, Lancelot J, Vanderstraete M, et al. Epigenetic Changes Modulate Schistosome Egg Formation and Are a Novel Target for Reducing Transmission of Schistosomiasis. Knight M, editor. *PLoS Pathog* [Internet]. 2014 May 8 [cited 2019 Sep 5];10(5):e1004116. Available from: <https://dx.plos.org/10.1371/journal.ppat.1004116>
9. Marek M, Kannan S, Hauser A-T, Moraes Mourão M, Caby S, Cura V, et al. Structural Basis for the Inhibition of Histone Deacetylase 8 (HDAC8), a Key Epigenetic Player in the Blood Fluke *Schistosoma mansoni*. Geary TG, editor. *PLoS Pathog* [Internet]. 2013 Sep 26 [cited 2019 Sep 5];9(9):e1003645. Available from: <https://dx.plos.org/10.1371/journal.ppat.1003645>
10. Simoben C, Robaa D, Chakrabarti A, Schmidtkunz K, Marek M, Lancelot J, et al. A Novel Class of *Schistosoma mansoni* Histone Deacetylase 8 (HDAC8) Inhibitors Identified by Structure-Based Virtual Screening and In Vitro Testing. *Molecules* [Internet]. 2018 Mar 2 [cited 2019 Sep 5];23(3):566. Available from: <http://www.mdpi.com/1420-3049/23/3/566>

11. Bayer T, Chakrabarti A, Lancelot J, Shaik TB, Hausmann K, Melesina J, et al. Synthesis, Crystallization Studies, and in vitro Characterization of Cinnamic Acid Derivatives as *Sm* HDAC8 Inhibitors for the Treatment of Schistosomiasis. *ChemMedChem* [Internet]. 2018 Aug 10 [cited 2019 Sep 5];13(15):1517–29. Available from: <http://doi.wiley.com/10.1002/cmde.201800238>
12. Monaldi D, Rotili D, Lancelot J, Marek M, Wössner N, Lucidi A, et al. Structure–Reactivity Relationships on Substrates and Inhibitors of the Lysine Deacylase Sirtuin 2 from *Schistosoma mansoni* ( *Sm* Sirt2) . *J Med Chem*. 2019;
13. Chucholl C, Morawetz K, Groß H. The clones are coming – strong increase in Marmorikrebs [*Procambarus fallax* (Hagen, 1870) f. *virginalis*] records from Europe. *Aquat Invasions* [Internet]. 2012 [cited 2019 Jun 12];7:511–9. Available from: <http://dx.doi.org/10.3391/ai.2012.7.4.008>
14. Pereira ASA, Amaral MS, Vasconcelos EJR, Pires DS, Asif H, daSilva LF, et al. Inhibition of histone methyltransferase EZH2 in *Schistosoma mansoni* in vitro by GSK343 reduces egg laying and decreases the expression of genes implicated in DNA replication and noncoding RNA metabolism. Greenberg RM, editor. *PLoS Negl Trop Dis* [Internet]. 2018 Oct 26 [cited 2019 Sep 5];12(10):e0006873. Available from: <http://dx.plos.org/10.1371/journal.pntd.0006873>
15. Roquis D, Taudt A, Geyer KK, Padalino G, Hoffmann KF, Holroyd N, et al. Histone methylation changes are required for life cycle progression in the human parasite *Schistosoma mansoni*. Hsieh MH, editor. *PLOS Pathog* [Internet]. 2018 May 21 [cited 2019 Sep 5];14(5):e1007066. Available from: <https://dx.plos.org/10.1371/journal.ppat.1007066>
16. Cosseau C, Wolkenhauer O, Padalino G, Geyer KK, Hoffmann KF, Grunau C. (Epi)genetic Inheritance in *Schistosoma mansoni*: A Systems Approach. *Trends Parasitol* [Internet]. 2017 Apr [cited 2019 Sep 5];33(4):285–94. Available from: <https://linkinghub.elsevier.com/retrieve/pii/S1471492216302240>
17. Padalino G, Ferla S, Brancale A, Chalmers IW, Hoffmann KF. Combining bioinformatics, cheminformatics, functional genomics and whole organism approaches for identifying epigenetic drug targets in *Schistosoma mansoni*. *Int J Parasitol Drugs Drug Resist* [Internet]. 2018 Dec [cited 2019 Sep 5];8(3):559–70. Available from: <https://linkinghub.elsevier.com/retrieve/pii/S2211320718301337>
18. Maiques-Diaz A, Somervaille TC. LSD1: biologic roles and therapeutic targeting. *Epigenomics* [Internet]. 2016 Aug [cited 2019 Sep 5];8(8):1103–16. Available from: <https://www.futuremedicine.com/doi/10.2217/epi-2016-0009>
19. Aravind L, Iyer LM. The SWIRM domain: a conserved module found in chromosomal proteins points to novel chromatin-modifying activities. *Genome Biol* [Internet]. 2002 Jul 24 [cited 2019 Oct 15];3(8):RESEARCH0039. Available from: <http://www.ncbi.nlm.nih.gov/pubmed/12186646>
20. Stavropoulos P, Blobel G, Hoelz A. Crystal structure and mechanism of human lysine-specific demethylase-1. *Nat Struct Mol Biol* [Internet]. 2006 Jul 25 [cited 2019 Sep 5];13(7):626–32. Available from: <http://www.nature.com/articles/nsmb1113>
21. Shi Y, Lan F, Matson C, Mulligan P, Whetstine JR, Cole PA, et al. Histone Demethylation Mediated by the Nuclear Amine Oxidase Homolog LSD1. *Cell*

- [Internet]. 2004 Dec [cited 2019 Sep 5];119(7):941–53. Available from: <https://linkinghub.elsevier.com/retrieve/pii/S0092867404011997>
22. Lee A, Borrello MT, Ganesan A. LSD (Lysine-Specific Demethylase): A Decade-Long Trip from Discovery to Clinical Trials . In 2019. p. 221–61.
  23. Pierce R. Targeting Schistosome Histone Modifying Enzymes for Drug Development. *Curr Pharm Des*. 2012;
  24. Ciccarelli FD, Doerks T, von Mering C, Creevey CJ, Snel B, Bork P. Toward Automatic Reconstruction of a Highly Resolved Tree of Life. *Science (80- )* [Internet]. 2006 Mar 3 [cited 2019 Oct 15];311(5765):1283–7. Available from: <http://www.ncbi.nlm.nih.gov/pubmed/16513982>
  25. Rotili D, Tomassi S, Conte M, Benedetti R, Tortorici M, Ciossani G, et al. Pan-Histone Demethylase Inhibitors Simultaneously Targeting Jumonji C and Lysine-Specific Demethylases Display High Anticancer Activities. *J Med Chem* [Internet]. 2014 Jan 9 [cited 2019 Sep 5];57(1):42–55. Available from: <https://pubs.acs.org/doi/10.1021/jm4012802>
  26. Ourailidou ME, Lenoci A, Zwergel C, Rotili D, Mai A, Dekker FJ. Towards the development of activity-based probes for detection of lysine-specific demethylase-1 activity. *Bioorg Med Chem* [Internet]. 2017 Feb [cited 2019 Sep 5];25(3):847–56. Available from: <https://linkinghub.elsevier.com/retrieve/pii/S0968089616312640>
  27. Bateman A, Martin MJ, O'Donovan C, Magrane M, Alpi E, Antunes R, et al. UniProt: the universal protein knowledgebase. *Nucleic Acids Res* [Internet]. 2017 Jan 4 [cited 2019 Oct 15];45(D1):D158–69. Available from: <https://academic.oup.com/nar/article-lookup/doi/10.1093/nar/gkw1099>
  28. Webb B, Sali A. Comparative Protein Structure Modeling Using MODELLER. In: *Current Protocols in Bioinformatics* [Internet]. Hoboken, NJ, USA: John Wiley & Sons, Inc.; 2016 [cited 2019 Oct 15]. p. 5.6.1-5.6.37. Available from: <http://doi.wiley.com/10.1002/cpbi.3>
  29. Binda C, Valente S, Romanenghi M, Pilotto S, Cirilli R, Karytinis A, et al. Biochemical, Structural, and Biological Evaluation of Tranilcypromine Derivatives as Inhibitors of Histone Demethylases LSD1 and LSD2. *J Am Chem Soc* [Internet]. 2010 May 19 [cited 2019 Oct 15];132(19):6827–33. Available from: <http://www.ncbi.nlm.nih.gov/pubmed/20415477>
  30. Smithers SR, Terry RJ. The infection of laboratory hosts with cercariae of *Schistosoma mansoni* and the recovery of the adult worms. *Parasitology* [Internet]. 1965 Nov 10 [cited 2019 Jun 17];55(4):695–700. Available from: [https://www.cambridge.org/core/product/identifier/S0031182000086248/type/journal\\_article](https://www.cambridge.org/core/product/identifier/S0031182000086248/type/journal_article)
  31. Lancelot J, Caby S, Dubois-Abdeselem F, Vanderstraete M, Trolet J, Oliveira G, et al. *Schistosoma mansoni* Sirtuins: Characterization and Potential as Chemotherapeutic Targets. Williams DL, editor. *PLoS Negl Trop Dis* [Internet]. 2013 Sep 12 [cited 2019 Jun 17];7(9):e2428. Available from: <https://dx.plos.org/10.1371/journal.pntd.0002428>
  32. Panic G, Flores D, Ingram-Sieber K, Keiser J. Fluorescence/luminescence-based markers for the assessment of *Schistosoma mansoni* schistosomula drug assays.

- Parasites and Vectors. 2015 Dec 8;8(1).
33. Dubois F, Caby S, Oger F, Cosseau C, Capron M, Grunau C, et al. Histone deacetylase inhibitors induce apoptosis, histone hyperacetylation and up-regulation of gene transcription in *Schistosoma mansoni*. *Mol Biochem Parasitol* [Internet]. 2009 Nov [cited 2019 Sep 5];168(1):7–15. Available from: <https://linkinghub.elsevier.com/retrieve/pii/S0166685109001601>
  34. Carneiro VC, de Abreu da Silva IC, Torres E JL, Caby S, Lancelot J, Vanderstraete M, et al. Epigenetic Changes Modulate Schistosome Egg Formation and Are a Novel Target for Reducing Transmission of Schistosomiasis. *PLoS Pathog*. 2014;10(5).
  35. Storey DM, Ogbogu VC. Observations on third-stage larvae and adults of *Litomosoides carinii* (Nematoda: Filarioidea) by scanning and transmission electron microscopy. *Ann Trop Med Parasitol*. 1991;85(1):111–21.
  36. Pereira ASA, Amaral MS, Vasconcelos EJR, Pires DS, Asif H, daSilva LF, et al. Inhibition of histone methyltransferase EZH2 in *Schistosoma mansoni* in vitro by GSK343 reduces egg laying and decreases the expression of genes implicated in DNA replication and noncoding RNA metabolism. Greenberg RM, editor. *PLoS Negl Trop Dis* [Internet]. 2018 Oct 26 [cited 2019 Jun 17];12(10):e0006873. Available from: <http://dx.plos.org/10.1371/journal.pntd.0006873>
  37. Bolger AM, Lohse M, Usadel B. Trimmomatic: a flexible trimmer for Illumina sequence data. *Bioinformatics* [Internet]. 2014 Aug 1 [cited 2019 Sep 5];30(15):2114–20. Available from: <https://academic.oup.com/bioinformatics/article-lookup/doi/10.1093/bioinformatics/btu170>
  38. Burg JM, Link JE, Morgan BS, Heller FJ, Hargrove AE, McCafferty DG. KDM1 class flavin-dependent protein lysine demethylases. *Biopolymers* [Internet]. 2015 Jul [cited 2019 Oct 15];104(4):213–46. Available from: <http://www.ncbi.nlm.nih.gov/pubmed/25787087>
  39. Bennesch MA, Segala G, Wider D, Picard D. LSD1 engages a corepressor complex for the activation of the estrogen receptor  $\alpha$  by estrogen and cAMP. *Nucleic Acids Res* [Internet]. 2016 Oct 14 [cited 2019 Oct 15];44(18):8655–70. Available from: <http://www.ncbi.nlm.nih.gov/pubmed/27325688>
  40. Pilotto S, Speranzini V, Tortorici M, Durand D, Fish A, Valente S, et al. Interplay among nucleosomal DNA, histone tails, and corepressor CoREST underlies LSD1-mediated H3 demethylation. *Proc Natl Acad Sci* [Internet]. 2015 Mar 3 [cited 2019 Oct 15];112(9):2752–7. Available from: <http://www.ncbi.nlm.nih.gov/pubmed/25730864>
  41. Dimitrova E, Turberfield AH, Klose RJ. Histone demethylases in chromatin biology and beyond. *EMBO Rep* [Internet]. 2015 Dec 12 [cited 2019 Oct 15];16(12):1620–39. Available from: <http://www.ncbi.nlm.nih.gov/pubmed/26564907>
  42. Frieling H, Bleich S. Tranylcypromine. *Eur Arch Psychiatry Clin Neurosci* [Internet]. 2006 Aug [cited 2019 Oct 15];256(5):268–73. Available from: <http://www.ncbi.nlm.nih.gov/pubmed/16927039>
  43. Mimasu S, Sengoku T, Fukuzawa S, Umehara T, Yokoyama S. Crystal structure of histone demethylase LSD1 and tranylcypromine at 2.25Å. *Biochem Biophys Res Commun* [Internet]. 2008 Feb 1 [cited 2019 Oct 15];366(1):15–22. Available from:



- <http://www.ncbi.nlm.nih.gov/pubmed/18039463>
44. Lee MG, Wynder C, Schmidt DM, McCafferty DG, Shiekhattar R. Histone H3 Lysine 4 Demethylation Is a Target of Nonselective Antidepressive Medications. *Chem Biol* [Internet]. 2006 Jun [cited 2019 Oct 15];13(6):563–7. Available from: <http://www.ncbi.nlm.nih.gov/pubmed/16793513>
  45. Shi Y. Histone lysine demethylases: emerging roles in development, physiology and disease. *Nat Rev Genet* [Internet]. 2007 Nov [cited 2019 Oct 15];8(11):829–33. Available from: <http://www.ncbi.nlm.nih.gov/pubmed/17909537>
  46. Mosammaparast N, Kim H, Laurent B, Zhao Y, Lim HJ, Majid MC, et al. The histone demethylase LSD1/KDM1A promotes the DNA damage response. *J Cell Biol* [Internet]. 2013 Nov 11 [cited 2019 Oct 15];203(3):457–70. Available from: <http://www.ncbi.nlm.nih.gov/pubmed/24217620>
  47. Hino S, Sakamoto A, Nagaoka K, Anan K, Wang Y, Mimasu S, et al. FAD-dependent lysine-specific demethylase-1 regulates cellular energy expenditure. *Nat Commun* [Internet]. 2012 Jan 27 [cited 2019 Oct 15];3(1):758. Available from: <http://www.nature.com/articles/ncomms1755>
  48. Sakamoto A, Hino S, Nagaoka K, Anan K, Takase R, Matsumori H, et al. Lysine Demethylase LSD1 Coordinates Glycolytic and Mitochondrial Metabolism in Hepatocellular Carcinoma Cells. *Cancer Res* [Internet]. 2015 Apr 1 [cited 2019 Oct 15];75(7):1445–56. Available from: <http://www.ncbi.nlm.nih.gov/pubmed/25649769>
  49. Tomic M, Allen A, Willmann D, Lepper C, Kim J, Duteil D, et al. Lsd1 regulates skeletal muscle regeneration and directs the fate of satellite cells. *Nat Commun* [Internet]. 2018 Dec 25 [cited 2019 Oct 15];9(1):366. Available from: <http://www.nature.com/articles/s41467-017-02740-5>
  50. Wang J, Scully K, Zhu X, Cai L, Zhang J, Prefontaine GG, et al. Opposing LSD1 complexes function in developmental gene activation and repression programmes. *Nature* [Internet]. 2007 Apr 28 [cited 2019 Oct 15];446(7138):882–7. Available from: <http://www.ncbi.nlm.nih.gov/pubmed/17392792>
  51. Jarriault S, Greenwald I. Suppressors of the egg-laying defective phenotype of sel-12 presenilin mutants implicate the CoREST corepressor complex in LIN-12/Notch signaling in *C. elegans*. *Genes Dev* [Internet]. 2002 Oct 15 [cited 2019 Oct 15];16(20):2713–28. Available from: <http://www.ncbi.nlm.nih.gov/pubmed/12381669>
  52. Eimer S, Lakowski B, Donhauser R, Baumeister R. Loss of spr-5 bypasses the requirement for the *C. elegans* presenilin sel-12 by derepressing hop-1. *EMBO J* [Internet]. 2002 Nov 1 [cited 2019 Oct 15];21(21):5787–96. Available from: <http://www.ncbi.nlm.nih.gov/pubmed/12411496>
  53. Katz DJ, Edwards TM, Reinke V, Kelly WG. A *C. elegans* LSD1 Demethylase Contributes to Germline Immortality by Reprogramming Epigenetic Memory. *Cell* [Internet]. 2009 Apr 17 [cited 2019 Oct 15];137(2):308–20. Available from: <http://www.ncbi.nlm.nih.gov/pubmed/19379696>
  54. Lan F, Zaratiegui M, Villén J, Vaughn MW, Verdel A, Huarte M, et al. *S. pombe* LSD1 Homologs Regulate Heterochromatin Propagation and Euchromatic Gene Transcription. *Mol Cell* [Internet]. 2007 Apr 13 [cited 2019 Oct 15];26(1):89–101.

Available from: <http://www.ncbi.nlm.nih.gov/pubmed/17434129>

55. Rudolph T, Yonezawa M, Lein S, Heidrich K, Kubicek S, Schäfer C, et al. Heterochromatin Formation in *Drosophila* Is Initiated through Active Removal of H3K4 Methylation by the LSD1 Homolog SU(VAR)3-3. *Mol Cell* [Internet]. 2007 Apr 13 [cited 2019 Oct 15];26(1):103–15. Available from: <http://www.ncbi.nlm.nih.gov/pubmed/17434130>
56. Yang F, Quan Z, Huang H, He M, Liu X, Cai T, et al. Ovaries absent links dLsd1 to HP1a for local H3K4 demethylation required for heterochromatic gene silencing. *Elife* [Internet]. 2019 Jan 16 [cited 2019 Oct 15];8. Available from: <https://elifesciences.org/articles/40806>
57. Zhang J, Bonasio R, Strino F, Kluger Y, Holloway JK, Modzelewski AJ, et al. SFMBT1 functions with LSD1 to regulate expression of canonical histone genes and chromatin-related factors. *Genes Dev* [Internet]. 2013 Apr 1 [cited 2019 Oct 15];27(7):749–66. Available from: <http://www.ncbi.nlm.nih.gov/pubmed/23592795>
58. Shaw MK, Erasmus DA. *Schistosoma mansoni*: praziquantel-induced changes to the female reproductive system. *Exp Parasitol* [Internet]. 1988 Feb [cited 2019 Oct 15];65(1):31–42. Available from: <http://www.ncbi.nlm.nih.gov/pubmed/3338547>
59. Bertão HG, da Silva RAR, Padilha RJR, de Azevedo Albuquerque MCP, Rádiz-Baptista G. Ultrastructural analysis of miltefosine-induced surface membrane damage in adult *Schistosoma mansoni* BH strain worms. *Parasitol Res* [Internet]. 2012 Jun 4 [cited 2019 Oct 15];110(6):2465–73. Available from: <http://www.ncbi.nlm.nih.gov/pubmed/22215191>
60. Xavier AML, Tavares D, Guimarães EV, Sarro-Silva M de F, Silva AC, de Moraes Neto AHA. Ultrastructural alterations in adult *Schistosoma mansoni*, harbored in non-antihelminthic treated and low-inflammatory mice by transmission electron microscopy (TEM). *Acta Trop* [Internet]. 2014 Feb [cited 2019 Oct 15];130:51–7. Available from: <http://www.ncbi.nlm.nih.gov/pubmed/24161877>
61. Ressurreição M, De Saram P, Kirk RS, Rollinson D, Emery AM, Page NM, et al. Protein Kinase C and Extracellular Signal-Regulated Kinase Regulate Movement, Attachment, Pairing and Egg Release in *Schistosoma mansoni*. Gasser RB, editor. *PLoS Negl Trop Dis* [Internet]. 2014 Jun 12 [cited 2019 Oct 15];8(6):e2924. Available from: <http://www.ncbi.nlm.nih.gov/pubmed/24921927>
62. Blair KL, Bennett JL, Pax RA. *Schistosoma mansoni*: Evidence for protein kinase-C-like modulation of muscle activity. *Exp Parasitol* [Internet]. 1988 Aug [cited 2019 Oct 15];66(2):243–52. Available from: <http://www.ncbi.nlm.nih.gov/pubmed/3165068>
63. Mair GR, Maule AG, Day TA, Halton DW. A confocal microscopical study of the musculature of adult *Schistosoma mansoni*. *Parasitology* [Internet]. 2000 Aug [cited 2019 Oct 15];121 ( Pt 2):163–70. Available from: <http://www.ncbi.nlm.nih.gov/pubmed/11085236>
64. McKerrow JH. Parasite proteases. *Exp Parasitol* [Internet]. 1989 Jan [cited 2019 Oct 15];68(1):111–5. Available from: <http://www.ncbi.nlm.nih.gov/pubmed/2645160>
65. Nawaratna SSK, Gobert GN, Willis C, Chuah C, McManus DP, Jones MK. Transcriptional profiling of the oesophageal gland region of male worms of

- Schistosoma mansoni*. Mol Biochem Parasitol [Internet]. 2014 Sep [cited 2019 Oct 15];196(2):82–9. Available from: <http://www.ncbi.nlm.nih.gov/pubmed/25149559>
66. Bosch IB, Wang ZX, Tao LF, Shoemaker CB. Two *Schistosoma mansoni* cDNAs encoding ATP-binding cassette (ABC) family proteins. Mol Biochem Parasitol [Internet]. 1994 Jun [cited 2019 Oct 15];65(2):351–6. Available from: <http://www.ncbi.nlm.nih.gov/pubmed/7969275>
67. Li Z, Jiang D, Fu X, Luo X, Liu R, He Y. Coupling of histone methylation and RNA processing by the nuclear mRNA cap-binding complex. Nat Plants [Internet]. 2016 Mar 29 [cited 2019 Oct 15];2(3):16015. Available from: <http://www.nature.com/articles/nplants201615>

## Support information Captions

**Supplementary Figure 1. Synthesis and IC<sub>50</sub> of MC3935.**

**Supplementary Figure 2. *Schistosoma mansoni* LSD1 protein alignment.**

**Supplementary Figure 3. Screening of synthetic small LSD1 inhibitors in *Schistosoma mansoni*.**

**Supplementary Figure 4. LSD1 inhibition affects egg production.**

**Supplementary Figure 5. SmLSD1 inhibition by MC3935 has no effect on H3K4 trimethylation in schistosomes.**

**Supplementary Figure 6. SmLSD1 knockdown partially recapitulates MC3935 phenotypes in adult worms.**
